# Supplementary material for: Nonsense-Mediated mRNA Decay Impacts MSI-Driven Carcinogenesis and Anti-Tumor Immunity in Colorectal Cancers
Source: PLoS One. 2008 Jul 9;3(7):e2583. doi: 10.1371/journal.pone.0002583 (PMC2440797; doi:10.1371/journal.pone.0002583)
Supplement: Table S1 — Genes expression data concerning HCT116 cells upon inhibition of UPF1 expression by siRNA. Only genes for which a significant de-regulation was observed (1.5 fold-change up or down with a p-value ≤0.005) in these conditions are listed. (0.25 MB XLS) [file pone.0002583.s001.xls]

## Sheet: Supplementary Table 1
Genes expression data concerning HCT116 cells upon inhibition of UPF1 expression by siRNA
ENSEMBL	Number of expressed probes	Analysed probes (number)	Expressed probes (%)	Genes expression (Log2) in cells treated with control siRNA	Gene expression (Log2) in cells treated with UPF1 siRNA	Regulation	Fold change (UPF1/control)
ENSG00000145782	26	29	89.6552	5.96	7.9	up	3.85
ENSG00000026652	58	69	84.058	5.47	7.33	up	3.63
ENSG00000150401	31	36	86.1111	5.35	7.19	up	3.59
ENSG00000100439	26	28	92.8571	5.54	7.39	up	3.58
ENSG00000100814	20	24	83.3333	6.85	8.55	up	3.24
ENSG00000106610	23	26	88.4615	5.51	7.01	up	2.83
ENSG00000006652	56	56	100	6.21	7.71	up	2.82
ENSG00000157106	186	189	98.4127	6.06	7.56	up	2.82
ENSG00000186501	28	33	84.8485	5.77	7.26	up	2.8
ENSG00000157514	21	43	48.8372	5.19	6.65	up	2.75
ENSG00000148926	24	37	64.8649	6.27	7.72	up	2.73
ENSG00000104221	30	35	85.7143	6.14	7.58	up	2.7
ENSG00000109065	40	42	95.2381	6.5	7.89	up	2.62
ENSG00000117174	38	43	88.3721	5.74	7.1	up	2.57
ENSG00000157823	30	32	93.75	6.88	8.25	up	2.57
ENSG00000161013	57	70	81.4286	6.12	7.47	up	2.56
ENSG00000149177	96	107	89.7196	5.41	6.75	up	2.53
ENSG00000103978	62	64	96.875	6.54	7.85	up	2.47
ENSG00000163513	31	33	93.9394	6.27	7.56	up	2.45
ENSG00000175197	20	21	95.2381	5.52	6.79	up	2.42
ENSG00000182670	23	31	74.1935	6.19	7.46	up	2.42
ENSG00000142794	26	29	89.6552	5.23	6.5	up	2.41
ENSG00000154144	44	54	81.4815	6.61	7.87	up	2.4
ENSG00000068323	41	63	65.0794	5.55	6.81	up	2.39
ENSG00000100867	29	37	78.3784	5.63	6.89	up	2.39
ENSG00000101246	32	47	68.0851	6.07	7.33	up	2.39
ENSG00000178381	28	33	84.8485	7.14	8.4	up	2.39
ENSG00000167130	28	36	77.7778	6.04	7.28	up	2.37
ENSG00000149792	23	28	82.1429	7.27	8.51	up	2.35
ENSG00000167540	42	60	70	5.76	6.98	up	2.32
ENSG00000120686	12	16	75	6.67	7.87	up	2.31
ENSG00000186162	12	23	52.1739	4.8	6.01	up	2.31
ENSG00000112308	24	24	100	7.18	8.38	up	2.3
ENSG00000134108	16	20	80	6.01	7.21	up	2.29
ENSG00000153558	54	60	90	5.8	7	up	2.29
ENSG00000156976	24	24	100	9.08	10.27	up	2.28
ENSG00000181666	17	38	44.7368	5.23	6.42	up	2.28
ENSG00000086300	24	32	75	6.09	7.27	up	2.27
ENSG00000076685	75	81	92.5926	6.91	8.07	up	2.24
ENSG00000091651	23	24	95.8333	6.1	7.27	up	2.24
ENSG00000100141	50	67	74.6269	6.2	7.36	up	2.24
ENSG00000137817	89	99	89.899	6.24	7.4	up	2.24
ENSG00000057757	18	19	94.7368	6.17	7.32	up	2.22
ENSG00000173226	28	31	90.3226	5.69	6.85	up	2.22
ENSG00000112763	38	48	79.1667	5.47	6.62	up	2.21
ENSG00000164953	106	114	92.9825	5.46	6.6	up	2.21
ENSG00000115084	62	80	77.5	4.96	6.09	up	2.2
ENSG00000136710	14	23	60.8696	5.81	6.94	up	2.19
ENSG00000154813	27	28	96.4286	6.22	7.35	up	2.19
ENSG00000164662	16	16	100	5.72	6.85	up	2.18
ENSG00000184787	14	14	100	6.79	7.91	up	2.18
ENSG00000038427	82	111	73.8739	5.62	6.73	up	2.17
ENSG00000113739	23	38	60.5263	6.62	7.73	up	2.17
ENSG00000138078	80	83	96.3855	6.34	7.46	up	2.17
ENSG00000141027	158	198	79.798	5.33	6.45	up	2.17
ENSG00000162735	39	44	88.6364	6.43	7.55	up	2.17
ENSG00000168638	26	32	81.25	7.39	8.51	up	2.17
ENSG00000135124	37	59	62.7119	5.03	6.13	up	2.15
ENSG00000169239	29	32	90.625	5.27	6.38	up	2.15
ENSG00000171793	62	64	96.875	7.09	8.2	up	2.15
ENSG00000100416	42	44	95.4545	6.55	7.65	up	2.14
ENSG00000108582	105	110	95.4545	6.02	7.11	up	2.14
ENSG00000125954	47	54	87.037	6.07	7.17	up	2.14
ENSG00000127080	40	54	74.0741	5.58	6.68	up	2.14
ENSG00000152601	49	51	96.0784	7.36	8.46	up	2.14
ENSG00000170876	65	71	91.5493	6.72	7.82	up	2.14
ENSG00000071189	106	127	83.4646	5.94	7.03	up	2.13
ENSG00000080546	43	56	76.7857	5.09	6.17	up	2.13
ENSG00000143570	27	30	90	6.85	7.93	up	2.12
ENSG00000146282	75	84	89.2857	7.15	8.23	up	2.12
ENSG00000162407	35	40	87.5	5.83	6.91	up	2.12
ENSG00000100664	55	58	94.8276	7.6	8.67	up	2.1
ENSG00000078399	39	46	84.7826	6.68	7.74	up	2.09
ENSG00000173409	32	36	88.8889	5.55	6.61	up	2.08
ENSG00000138942	21	28	75	5.24	6.29	up	2.07
ENSG00000160746	49	54	90.7407	5.85	6.9	up	2.07
ENSG00000185651	29	31	93.5484	6.65	7.69	up	2.07
ENSG00000091947	20	24	83.3333	6.8	7.84	up	2.06
ENSG00000198037	19	20	95	5.56	6.6	up	2.06
ENSG00000068028	28	49	57.1429	6.06	7.1	up	2.05
ENSG00000136444	17	30	56.6667	6.11	7.15	up	2.05
ENSG00000156508	26	30	86.6667	5.57	6.61	up	2.05
ENSG00000178977	15	32	46.875	4.5	5.54	up	2.05
ENSG00000196262	15	16	93.75	5.61	6.64	up	2.05
ENSG00000049167	49	61	80.3279	5.15	6.18	up	2.04
ENSG00000124641	14	16	87.5	5.58	6.61	up	2.04
ENSG00000153481	55	60	91.6667	5.93	6.96	up	2.04
ENSG00000163719	68	76	89.4737	6.28	7.31	up	2.04
ENSG00000188315	19	24	79.1667	5.15	6.18	up	2.04
ENSG00000011638	23	28	82.1429	6.4	7.42	up	2.03
ENSG00000013561	26	26	100	7.12	8.15	up	2.03
ENSG00000070718	59	66	89.3939	5.83	6.85	up	2.03
ENSG00000177082	36	45	80	6.33	7.35	up	2.03
ENSG00000080815	63	68	92.6471	6.49	7.51	up	2.02
ENSG00000146684	24	38	63.1579	5.19	6.2	up	2.02
ENSG00000170779	19	21	90.4762	7.21	8.22	up	2.02
ENSG00000171503	55	61	90.1639	5.93	6.95	up	2.02
ENSG00000059769	35	37	94.5946	6.28	7.29	up	2.01
ENSG00000197580	44	71	61.9718	5.09	6.1	up	2.01
ENSG00000100271	26	58	44.8276	5.22	6.22	up	2
ENSG00000107262	38	45	84.4444	7.22	8.22	up	2
ENSG00000124532	37	41	90.2439	6.61	7.61	up	2
ENSG00000138794	25	27	92.5926	6.09	7.09	up	2
ENSG00000151718	97	130	74.6154	5.58	6.58	up	2
ENSG00000164124	52	72	72.2222	5.4	6.4	up	2
ENSG00000168003	61	71	85.9155	8.23	9.22	up	2
ENSG00000094880	72	75	96	6.68	7.68	up	1.99
ENSG00000111653	26	28	92.8571	5.82	6.81	up	1.99
ENSG00000167766	42	49	85.7143	5.6	6.59	up	1.99
ENSG00000013588	15	16	93.75	7.68	8.67	up	1.98
ENSG00000111897	39	39	100	6.71	7.69	up	1.98
ENSG00000152422	37	37	100	7.11	8.09	up	1.98
ENSG00000164442	18	22	81.8182	5.77	6.75	up	1.98
ENSG00000116717	26	31	83.871	7.24	8.22	up	1.97
ENSG00000117616	29	35	82.8571	5.83	6.8	up	1.97
ENSG00000117748	20	22	90.9091	7.14	8.12	up	1.97
ENSG00000139112	21	36	58.3333	5.89	6.87	up	1.97
ENSG00000164168	60	64	93.75	6.41	7.39	up	1.97
ENSG00000106080	17	20	85	5.95	6.92	up	1.96
ENSG00000140950	36	57	63.1579	5.91	6.88	up	1.96
ENSG00000175265	18	21	85.7143	5.49	6.46	up	1.96
ENSG00000121067	40	40	100	6.78	7.75	up	1.95
ENSG00000137504	35	41	85.3659	6.05	7.01	up	1.95
ENSG00000140830	18	18	100	6.2	7.16	up	1.95
ENSG00000173611	26	28	92.8571	5.35	6.31	up	1.95
ENSG00000177479	50	51	98.0392	6.84	7.8	up	1.95
ENSG00000096093	46	72	63.8889	4.65	5.6	up	1.94
ENSG00000104231	26	26	100	7.15	8.11	up	1.94
ENSG00000119559	12	17	70.5882	6.47	7.43	up	1.94
ENSG00000131373	70	76	92.1053	6.01	6.96	up	1.94
ENSG00000134255	36	40	90	6.86	7.81	up	1.94
ENSG00000179454	22	23	95.6522	5.78	6.74	up	1.94
ENSG00000186432	37	40	92.5	7.45	8.41	up	1.94
ENSG00000031698	53	53	100	8.41	9.36	up	1.93
ENSG00000096682	30	31	96.7742	9.2	10.14	up	1.93
ENSG00000100522	16	17	94.1176	6.87	7.83	up	1.93
ENSG00000101452	78	88	88.6364	5.89	6.84	up	1.93
ENSG00000101782	52	68	76.4706	6.94	7.89	up	1.93
ENSG00000104626	33	37	89.1892	6.43	7.37	up	1.93
ENSG00000106701	36	49	73.4694	4.73	5.68	up	1.93
ENSG00000117758	38	43	88.3721	6.2	7.15	up	1.93
ENSG00000127993	17	27	62.963	5.54	6.49	up	1.93
ENSG00000137509	44	48	91.6667	6.69	7.63	up	1.93
ENSG00000164180	28	35	80	6.02	6.97	up	1.93
ENSG00000172939	57	63	90.4762	6.81	7.76	up	1.93
ENSG00000176108	27	41	65.8537	5.94	6.89	up	1.93
ENSG00000062716	53	55	96.3636	8.05	8.99	up	1.92
ENSG00000074935	34	43	79.0698	5.57	6.51	up	1.92
ENSG00000088356	19	23	82.6087	6.69	7.62	up	1.92
ENSG00000119725	56	61	91.8033	6.12	7.06	up	1.92
ENSG00000146409	57	59	96.6102	6.54	7.48	up	1.92
ENSG00000151694	76	81	93.8272	6.29	7.23	up	1.92
ENSG00000155329	18	25	72	5.59	6.54	up	1.92
ENSG00000168096	35	69	50.7246	5.14	6.08	up	1.92
ENSG00000181929	44	48	91.6667	7.87	8.81	up	1.92
ENSG00000009413	129	147	87.7551	5.71	6.65	up	1.91
ENSG00000092531	23	26	88.4615	6.28	7.21	up	1.91
ENSG00000116001	79	87	90.8046	5.93	6.86	up	1.91
ENSG00000136816	38	42	90.4762	5.91	6.85	up	1.91
ENSG00000163660	79	88	89.7727	5.91	6.84	up	1.91
ENSG00000100483	19	30	63.3333	5.27	6.2	up	1.9
ENSG00000104164	19	25	76	5.86	6.78	up	1.9
ENSG00000113391	42	51	82.3529	5.99	6.91	up	1.9
ENSG00000138032	33	44	75	6.31	7.23	up	1.9
ENSG00000147912	32	43	74.4186	5.31	6.23	up	1.9
ENSG00000164535	55	74	74.3243	6.03	6.95	up	1.9
ENSG00000166024	64	69	92.7536	5.51	6.44	up	1.9
ENSG00000172270	38	42	90.4762	8.85	9.77	up	1.9
ENSG00000175061	43	50	86	7.01	7.94	up	1.9
ENSG00000104980	41	43	95.3488	7.06	7.97	up	1.89
ENSG00000129071	44	48	91.6667	5.58	6.5	up	1.89
ENSG00000131381	52	70	74.2857	5.42	6.34	up	1.89
ENSG00000137760	45	47	95.7447	5.46	6.38	up	1.89
ENSG00000170417	19	30	63.3333	5.79	6.71	up	1.89
ENSG00000005884	117	128	91.4062	7.6	8.51	up	1.88
ENSG00000037749	18	20	90	5.98	6.9	up	1.88
ENSG00000070610	88	98	89.7959	6.06	6.98	up	1.88
ENSG00000092439	163	172	94.7674	5.89	6.79	up	1.88
ENSG00000120370	33	51	64.7059	4.99	5.9	up	1.88
ENSG00000125814	50	72	69.4444	5.08	5.99	up	1.88
ENSG00000147889	22	32	68.75	6.87	7.78	up	1.88
ENSG00000161179	20	32	62.5	6.3	7.21	up	1.88
ENSG00000170647	14	16	87.5	5.24	6.16	up	1.88
ENSG00000171861	21	24	87.5	7.01	7.92	up	1.88
ENSG00000174738	44	48	91.6667	6.26	7.17	up	1.88
ENSG00000176718	20	27	74.0741	7.43	8.35	up	1.88
ENSG00000186866	43	57	75.4386	5.69	6.6	up	1.88
ENSG00000050426	47	49	95.9184	6.41	7.32	up	1.87
ENSG00000085382	93	118	78.8136	5.23	6.13	up	1.87
ENSG00000113580	49	58	84.4828	5.31	6.21	up	1.87
ENSG00000116957	71	75	94.6667	6.03	6.93	up	1.87
ENSG00000134970	43	48	89.5833	7.23	8.13	up	1.87
ENSG00000149476	45	59	76.2712	5.78	6.69	up	1.87
ENSG00000166340	58	67	86.5672	6.04	6.94	up	1.87
ENSG00000185324	56	63	88.8889	6.29	7.2	up	1.87
ENSG00000085449	67	69	97.1014	6.39	7.29	up	1.86
ENSG00000110092	29	29	100	8.78	9.68	up	1.86
ENSG00000112149	22	28	78.5714	5.57	6.46	up	1.86
ENSG00000118564	45	52	86.5385	6.01	6.91	up	1.86
ENSG00000136631	62	71	87.3239	6.25	7.14	up	1.86
ENSG00000161265	39	67	58.209	5.63	6.53	up	1.86
ENSG00000162772	20	37	54.0541	5.67	6.57	up	1.86
ENSG00000167977	23	23	100	6.91	7.81	up	1.86
ENSG00000176783	58	63	92.0635	5.98	6.87	up	1.86
ENSG00000177034	38	56	67.8571	5.57	6.47	up	1.86
ENSG00000198952	106	114	92.9825	6.67	7.56	up	1.86
ENSG00000069943	60	69	86.9565	5.49	6.37	up	1.85
ENSG00000100263	14	25	56	5.69	6.58	up	1.85
ENSG00000105053	42	51	82.3529	6.29	7.18	up	1.85
ENSG00000107021	34	35	97.1429	5.79	6.67	up	1.85
ENSG00000123159	19	24	79.1667	7	7.89	up	1.85
ENSG00000131791	31	34	91.1765	6.48	7.37	up	1.85
ENSG00000139651	41	47	87.234	5.87	6.75	up	1.85
ENSG00000148943	26	26	100	6.88	7.76	up	1.85
ENSG00000158169	71	95	74.7368	5.43	6.32	up	1.85
ENSG00000162607	52	66	78.7879	6.32	7.2	up	1.85
ENSG00000165195	23	28	82.1429	5.66	6.54	up	1.85
ENSG00000168564	32	41	78.0488	5.45	6.33	up	1.85
ENSG00000131051	51	54	94.4444	6.41	7.28	up	1.84
ENSG00000134884	44	55	80	5.84	6.72	up	1.84
ENSG00000136925	43	62	69.3548	5.44	6.33	up	1.84
ENSG00000138161	30	76	39.4737	5.24	6.12	up	1.84
ENSG00000140553	73	118	61.8644	6.97	7.85	up	1.84
ENSG00000156162	74	81	91.358	6.02	6.89	up	1.84
ENSG00000171346	41	60	68.3333	5.79	6.67	up	1.84
ENSG00000196756	53	67	79.1045	5.84	6.72	up	1.84
ENSG00000088448	57	67	85.0746	6.36	7.23	up	1.83
ENSG00000101146	52	53	98.1132	7.85	8.72	up	1.83
ENSG00000105341	24	28	85.7143	6.81	7.68	up	1.83
ENSG00000111911	15	18	83.3333	5.95	6.82	up	1.83
ENSG00000131408	29	44	65.9091	5.88	6.75	up	1.83
ENSG00000144713	18	20	90	5.25	6.12	up	1.83
ENSG00000152380	18	24	75	4.62	5.49	up	1.83
ENSG00000164695	19	23	82.6087	5.96	6.83	up	1.83
ENSG00000166780	26	39	66.6667	5.99	6.87	up	1.83
ENSG00000166987	44	79	55.6962	5.2	6.07	up	1.83
ENSG00000170537	50	72	69.4444	5.27	6.14	up	1.83
ENSG00000185246	68	76	89.4737	5.87	6.75	up	1.83
ENSG00000185567	39	47	82.9787	5.53	6.41	up	1.83
ENSG00000002919	31	41	75.6098	6.13	7	up	1.82
ENSG00000011295	33	39	84.6154	7.16	8.02	up	1.82
ENSG00000023287	84	99	84.8485	5.72	6.58	up	1.82
ENSG00000033627	83	88	94.3182	6.7	7.57	up	1.82
ENSG00000062725	62	74	83.7838	6.78	7.64	up	1.82
ENSG00000103174	24	51	47.0588	5.73	6.6	up	1.82
ENSG00000103671	42	48	87.5	6	6.86	up	1.82
ENSG00000106443	74	99	74.7475	5.21	6.07	up	1.82
ENSG00000128059	26	26	100	7.06	7.92	up	1.82
ENSG00000131459	68	89	76.4045	5.24	6.1	up	1.82
ENSG00000132773	36	40	90	6.33	7.19	up	1.82
ENSG00000136051	108	121	89.2562	6.12	6.98	up	1.82
ENSG00000136144	43	46	93.4783	5.49	6.36	up	1.82
ENSG00000149179	33	39	84.6154	6.5	7.37	up	1.82
ENSG00000151148	110	132	83.3333	5.96	6.82	up	1.82
ENSG00000152291	43	52	82.6923	6.24	7.1	up	1.82
ENSG00000162413	27	36	75	6.14	7	up	1.82
ENSG00000174485	144	178	80.8989	5.43	6.3	up	1.82
ENSG00000174628	39	57	68.4211	5.62	6.48	up	1.82
ENSG00000184474	14	16	87.5	4.92	5.78	up	1.82
ENSG00000092621	57	84	67.8571	7.39	8.25	up	1.81
ENSG00000092931	46	58	79.3103	5.64	6.5	up	1.81
ENSG00000106404	14	32	43.75	5.29	6.15	up	1.81
ENSG00000110660	27	30	90	8.11	8.96	up	1.81
ENSG00000116138	67	84	79.7619	6.41	7.26	up	1.81
ENSG00000117620	40	41	97.561	5.89	6.74	up	1.81
ENSG00000140157	42	52	80.7692	7.5	8.35	up	1.81
ENSG00000141699	41	55	74.5455	6.48	7.33	up	1.81
ENSG00000142230	31	32	96.875	7.76	8.62	up	1.81
ENSG00000144659	13	20	65	7.36	8.21	up	1.81
ENSG00000147471	28	29	96.5517	7.29	8.15	up	1.81
ENSG00000169762	57	73	78.0822	5.47	6.33	up	1.81
ENSG00000175224	76	93	81.7204	6.54	7.4	up	1.81
ENSG00000027697	44	46	95.6522	6.1	6.94	up	1.8
ENSG00000030110	23	28	82.1429	6.14	6.99	up	1.8
ENSG00000065923	29	38	76.3158	6.46	7.3	up	1.8
ENSG00000110619	92	112	82.1429	6.7	7.56	up	1.8
ENSG00000112079	48	51	94.1176	6.34	7.18	up	1.8
ENSG00000112414	123	134	91.791	6.45	7.3	up	1.8
ENSG00000122861	45	50	90	6.91	7.76	up	1.8
ENSG00000130717	26	39	66.6667	6.32	7.17	up	1.8
ENSG00000137955	64	85	75.2941	7.25	8.1	up	1.8
ENSG00000148660	79	102	77.451	6.39	7.23	up	1.8
ENSG00000162601	73	85	85.8824	5.63	6.49	up	1.8
ENSG00000167118	30	37	81.0811	6.96	7.81	up	1.8
ENSG00000172273	39	45	86.6667	6.35	7.19	up	1.8
ENSG00000174695	12	12	100	7.25	8.1	up	1.8
ENSG00000092421	73	100	73	4.95	5.79	up	1.79
ENSG00000099860	23	33	69.697	6.76	7.6	up	1.79
ENSG00000120253	51	52	98.0769	6.96	7.8	up	1.79
ENSG00000130734	30	41	73.1707	6.66	7.5	up	1.79
ENSG00000135164	75	101	74.2574	5.88	6.72	up	1.79
ENSG00000147439	23	33	69.697	6.46	7.3	up	1.79
ENSG00000151461	96	105	91.4286	5.94	6.79	up	1.79
ENSG00000185298	15	18	83.3333	5.82	6.66	up	1.79
ENSG00000011258	53	68	77.9412	5.67	6.5	up	1.78
ENSG00000115419	78	81	96.2963	6.51	7.34	up	1.78
ENSG00000118961	43	49	87.7551	5.81	6.64	up	1.78
ENSG00000119599	36	52	69.2308	5.27	6.11	up	1.78
ENSG00000129932	13	21	61.9048	5.99	6.82	up	1.78
ENSG00000137361	34	41	82.9268	7.26	8.1	up	1.78
ENSG00000144396	45	73	61.6438	4.97	5.81	up	1.78
ENSG00000144744	62	64	96.875	7.29	8.12	up	1.78
ENSG00000151881	31	36	86.1111	6.25	7.08	up	1.78
ENSG00000157191	50	54	92.5926	7.34	8.18	up	1.78
ENSG00000164659	76	86	88.3721	6.12	6.95	up	1.78
ENSG00000175213	21	40	52.5	5.53	6.36	up	1.78
ENSG00000180089	12	34	35.2941	5.19	6.02	up	1.78
ENSG00000013374	55	62	88.7097	6.37	7.2	up	1.77
ENSG00000077147	66	69	95.6522	7.74	8.56	up	1.77
ENSG00000091732	55	64	85.9375	6.26	7.08	up	1.77
ENSG00000103429	39	40	97.5	6.69	7.52	up	1.77
ENSG00000104969	40	40	100	7.45	8.27	up	1.77
ENSG00000110911	86	110	78.1818	6.07	6.89	up	1.77
ENSG00000111011	52	58	89.6552	6.71	7.54	up	1.77
ENSG00000117569	47	55	85.4545	5.3	6.12	up	1.77
ENSG00000124222	31	35	88.5714	5.63	6.45	up	1.77
ENSG00000129515	27	34	79.4118	8.28	9.1	up	1.77
ENSG00000145632	58	62	93.5484	7.13	7.95	up	1.77
ENSG00000147050	90	102	88.2353	5.17	6	up	1.77
ENSG00000148634	109	126	86.5079	6.09	6.92	up	1.77
ENSG00000151012	56	56	100	6.57	7.39	up	1.77
ENSG00000163898	50	56	89.2857	5.4	6.23	up	1.77
ENSG00000167515	33	38	86.8421	7.26	8.09	up	1.77
ENSG00000168827	83	93	89.2473	6.39	7.22	up	1.77
ENSG00000072958	49	52	94.2308	6.68	7.5	up	1.76
ENSG00000108587	29	32	90.625	6.66	7.47	up	1.76
ENSG00000111880	74	84	88.0952	6.26	7.08	up	1.76
ENSG00000112472	43	55	78.1818	5.67	6.48	up	1.76
ENSG00000114771	21	36	58.3333	4.32	5.14	up	1.76
ENSG00000114982	87	115	75.6522	5.94	6.75	up	1.76
ENSG00000115355	128	166	77.1084	5.22	6.04	up	1.76
ENSG00000120314	29	41	70.7317	6.34	7.15	up	1.76
ENSG00000123505	30	30	100	7.09	7.91	up	1.76
ENSG00000125779	42	54	77.7778	6.92	7.74	up	1.76
ENSG00000128585	74	78	94.8718	6.62	7.44	up	1.76
ENSG00000136280	41	53	77.3585	6.15	6.96	up	1.76
ENSG00000137944	43	50	86	5.91	6.73	up	1.76
ENSG00000138821	39	47	82.9787	6.39	7.21	up	1.76
ENSG00000145817	25	32	78.125	6.75	7.57	up	1.76
ENSG00000154065	27	46	58.6957	4.85	5.67	up	1.76
ENSG00000166200	50	52	96.1538	7.85	8.67	up	1.76
ENSG00000166301	19	37	51.3514	5.3	6.11	up	1.76
ENSG00000187097	33	52	63.4615	5.54	6.36	up	1.76
ENSG00000073605	26	40	65	4.8	5.61	up	1.75
ENSG00000075975	44	44	100	6.73	7.53	up	1.75
ENSG00000080345	143	175	81.7143	6.12	6.92	up	1.75
ENSG00000102181	38	55	69.0909	5.28	6.09	up	1.75
ENSG00000124145	19	20	95	7.51	8.32	up	1.75
ENSG00000124193	15	17	88.2353	6.73	7.54	up	1.75
ENSG00000133119	33	34	97.0588	7.06	7.87	up	1.75
ENSG00000152332	32	32	100	7.84	8.65	up	1.75
ENSG00000159720	32	33	96.9697	7.45	8.25	up	1.75
ENSG00000161204	81	95	85.2632	6.63	7.43	up	1.75
ENSG00000163510	70	87	80.4598	6.03	6.83	up	1.75
ENSG00000178761	51	74	68.9189	5.33	6.14	up	1.75
ENSG00000198231	84	85	98.8235	7.16	7.97	up	1.75
ENSG00000198500	14	19	73.6842	5.24	6.05	up	1.75
ENSG00000077458	40	61	65.5738	5.23	6.03	up	1.74
ENSG00000090857	33	45	73.3333	5.58	6.39	up	1.74
ENSG00000102908	125	142	88.0282	6.46	7.26	up	1.74
ENSG00000106052	84	85	98.8235	7.1	7.9	up	1.74
ENSG00000111203	33	45	73.3333	5.71	6.51	up	1.74
ENSG00000114999	45	48	93.75	7.12	7.92	up	1.74
ENSG00000124275	80	89	89.8876	6.91	7.71	up	1.74
ENSG00000126070	79	83	95.1807	6.14	6.94	up	1.74
ENSG00000132952	59	68	86.7647	6.11	6.9	up	1.74
ENSG00000139636	52	85	61.1765	5.87	6.67	up	1.74
ENSG00000140495	55	67	82.0896	6.23	7.02	up	1.74
ENSG00000143367	37	65	56.9231	5.18	5.98	up	1.74
ENSG00000144228	55	56	98.2143	6.47	7.27	up	1.74
ENSG00000153561	39	40	97.5	6.65	7.45	up	1.74
ENSG00000156531	47	52	90.3846	6.61	7.41	up	1.74
ENSG00000172262	21	21	100	5.72	6.52	up	1.74
ENSG00000174442	62	76	81.5789	5.95	6.75	up	1.74
ENSG00000174718	16	16	100	6.73	7.53	up	1.74
ENSG00000181381	61	74	82.4324	5.59	6.39	up	1.74
ENSG00000189079	117	139	84.1727	6.22	7.02	up	1.74
ENSG00000197548	83	108	76.8519	5.76	6.56	up	1.74
ENSG00000029364	36	37	97.2973	7.23	8.02	up	1.73
ENSG00000043514	49	53	92.4528	6.65	7.45	up	1.73
ENSG00000110074	40	58	68.9655	6.07	6.86	up	1.73
ENSG00000111725	27	40	67.5	6.15	6.94	up	1.73
ENSG00000112851	103	112	91.9643	6.33	7.12	up	1.73
ENSG00000114648	65	75	86.6667	6.35	7.14	up	1.73
ENSG00000115459	45	94	47.8723	4.93	5.73	up	1.73
ENSG00000116199	30	35	85.7143	6.36	7.16	up	1.73
ENSG00000118267	42	60	70	5.43	6.22	up	1.73
ENSG00000121749	57	64	89.0625	6.33	7.12	up	1.73
ENSG00000123106	42	57	73.6842	5.56	6.35	up	1.73
ENSG00000124164	50	57	87.7193	6.08	6.88	up	1.73
ENSG00000131470	35	50	70	6.76	7.56	up	1.73
ENSG00000138660	36	42	85.7143	6.56	7.35	up	1.73
ENSG00000139620	54	65	83.0769	6.25	7.05	up	1.73
ENSG00000141682	21	24	87.5	7.28	8.08	up	1.73
ENSG00000162517	15	16	93.75	7.13	7.91	up	1.73
ENSG00000162616	15	16	93.75	6.62	7.42	up	1.73
ENSG00000163281	47	55	85.4545	5.77	6.56	up	1.73
ENSG00000163378	68	83	81.9277	5.52	6.31	up	1.73
ENSG00000164331	32	40	80	5.19	5.97	up	1.73
ENSG00000166575	68	77	88.3117	6.3	7.09	up	1.73
ENSG00000175970	44	49	89.7959	6.25	7.04	up	1.73
ENSG00000181938	36	40	90	6.43	7.22	up	1.73
ENSG00000182208	19	34	55.8824	5.12	5.91	up	1.73
ENSG00000001167	42	50	84	6.7	7.49	up	1.72
ENSG00000047056	49	66	74.2424	5.3	6.08	up	1.72
ENSG00000082258	76	80	95	5.82	6.6	up	1.72
ENSG00000101158	75	81	92.5926	6.92	7.7	up	1.72
ENSG00000101596	109	120	90.8333	5.84	6.63	up	1.72
ENSG00000102547	30	44	68.1818	4.86	5.65	up	1.72
ENSG00000104343	20	20	100	7.62	8.41	up	1.72
ENSG00000108296	28	37	75.6757	5.84	6.62	up	1.72
ENSG00000113369	49	52	94.2308	5.95	6.73	up	1.72
ENSG00000114353	30	37	81.0811	7.54	8.32	up	1.72
ENSG00000140463	61	72	84.7222	5.68	6.47	up	1.72
ENSG00000141510	34	36	94.4444	6.51	7.29	up	1.72
ENSG00000145390	69	72	95.8333	6.05	6.83	up	1.72
ENSG00000148154	30	33	90.9091	7.15	7.93	up	1.72
ENSG00000158526	29	32	90.625	6.32	7.1	up	1.72
ENSG00000164169	54	64	84.375	5.62	6.41	up	1.72
ENSG00000164916	30	36	83.3333	6.5	7.29	up	1.72
ENSG00000170113	25	38	65.7895	6.64	7.41	up	1.72
ENSG00000182768	46	112	41.0714	7.24	8.03	up	1.72
ENSG00000182919	39	40	97.5	6.82	7.6	up	1.72
ENSG00000196511	30	60	50	5.21	5.99	up	1.72
ENSG00000038274	31	44	70.4545	6.89	7.67	up	1.71
ENSG00000049883	38	39	97.4359	6.17	6.94	up	1.71
ENSG00000111358	43	44	97.7273	7.41	8.18	up	1.71
ENSG00000118007	118	136	86.7647	5.7	6.47	up	1.71
ENSG00000130921	21	42	50	5.87	6.64	up	1.71
ENSG00000160218	109	113	96.4602	6.07	6.84	up	1.71
ENSG00000160570	28	37	75.6757	6.5	7.27	up	1.71
ENSG00000164038	50	54	92.5926	6.04	6.82	up	1.71
ENSG00000168904	48	61	78.6885	6.11	6.89	up	1.71
ENSG00000176390	31	32	96.875	6.96	7.73	up	1.71
ENSG00000001461	47	58	81.0345	6.12	6.88	up	1.7
ENSG00000015532	35	56	62.5	5.76	6.52	up	1.7
ENSG00000081177	45	56	80.3571	5.92	6.68	up	1.7
ENSG00000085465	29	59	49.1525	4.94	5.71	up	1.7
ENSG00000085511	107	117	91.453	6.13	6.9	up	1.7
ENSG00000103264	41	58	70.6897	5.93	6.69	up	1.7
ENSG00000103591	40	46	86.9565	7.24	8.01	up	1.7
ENSG00000115464	310	341	90.9091	6.42	7.19	up	1.7
ENSG00000116918	20	28	71.4286	6.63	7.39	up	1.7
ENSG00000125734	65	81	80.2469	6.72	7.49	up	1.7
ENSG00000125775	14	41	34.1463	5.27	6.04	up	1.7
ENSG00000135506	77	89	86.5169	7.13	7.9	up	1.7
ENSG00000136758	81	82	98.7805	8.14	8.91	up	1.7
ENSG00000153786	43	46	93.4783	7.21	7.97	up	1.7
ENSG00000156171	46	56	82.1429	6.78	7.55	up	1.7
ENSG00000162236	44	51	86.2745	6.24	7.01	up	1.7
ENSG00000162971	34	48	70.8333	5.52	6.28	up	1.7
ENSG00000166012	48	59	81.3559	6.42	7.18	up	1.7
ENSG00000177410	26	32	81.25	9.14	9.9	up	1.7
ENSG00000178878	55	69	79.7101	8.19	8.95	up	1.7
ENSG00000181026	20	25	80	6.15	6.92	up	1.7
ENSG00000006062	36	78	46.1538	5.58	6.34	up	1.69
ENSG00000049246	73	128	57.0312	4.98	5.74	up	1.69
ENSG00000087206	56	61	91.8033	5.94	6.7	up	1.69
ENSG00000100335	49	63	77.7778	6.57	7.32	up	1.69
ENSG00000101337	87	97	89.6907	7.26	8.02	up	1.69
ENSG00000102898	13	14	92.8571	6.62	7.38	up	1.69
ENSG00000122687	20	25	80	6.83	7.58	up	1.69
ENSG00000123268	33	34	97.0588	6.79	7.54	up	1.69
ENSG00000126391	12	17	70.5882	5.62	6.38	up	1.69
ENSG00000134352	52	56	92.8571	6.31	7.07	up	1.69
ENSG00000140987	33	56	58.9286	5.54	6.29	up	1.69
ENSG00000144366	52	66	78.7879	5.54	6.3	up	1.69
ENSG00000146414	117	149	78.5235	5.32	6.08	up	1.69
ENSG00000167074	12	25	48	5	5.76	up	1.69
ENSG00000169379	42	48	87.5	5.74	6.5	up	1.69
ENSG00000187122	66	75	88	6.31	7.07	up	1.69
ENSG00000081377	28	49	57.1429	5.38	6.12	up	1.68
ENSG00000101574	38	44	86.3636	5.42	6.17	up	1.68
ENSG00000102317	39	44	88.6364	7.08	7.83	up	1.68
ENSG00000103852	43	83	51.8072	5.18	5.93	up	1.68
ENSG00000104886	16	30	53.3333	6.84	7.58	up	1.68
ENSG00000105186	103	119	86.5546	6.31	7.06	up	1.68
ENSG00000106771	92	99	92.9293	7.06	7.8	up	1.68
ENSG00000110768	38	44	86.3636	6.31	7.06	up	1.68
ENSG00000111711	28	29	96.5517	6.53	7.28	up	1.68
ENSG00000111799	226	243	93.0041	6.41	7.16	up	1.68
ENSG00000114316	74	77	96.1039	6.21	6.96	up	1.68
ENSG00000125772	20	30	66.6667	5.36	6.11	up	1.68
ENSG00000126522	17	19	89.4737	6.46	7.21	up	1.68
ENSG00000130363	37	52	71.1538	5.95	6.7	up	1.68
ENSG00000130513	28	29	96.5517	8.45	9.2	up	1.68
ENSG00000155313	88	107	82.243	5.95	6.7	up	1.68
ENSG00000159899	61	91	67.033	4.92	5.67	up	1.68
ENSG00000160310	57	82	69.5122	6.55	7.3	up	1.68
ENSG00000163681	85	93	91.3978	6.06	6.81	up	1.68
ENSG00000165175	12	15	80	6.9	7.65	up	1.68
ENSG00000166411	54	62	87.0968	8.03	8.77	up	1.68
ENSG00000168434	61	70	87.1429	5.82	6.57	up	1.68
ENSG00000169236	36	68	52.9412	5.71	6.46	up	1.68
ENSG00000185009	51	58	87.931	7.86	8.61	up	1.68
ENSG00000048544	13	14	92.8571	7.28	8.02	up	1.67
ENSG00000055917	105	107	98.1308	6.87	7.61	up	1.67
ENSG00000065802	43	49	87.7551	6.15	6.89	up	1.67
ENSG00000074696	54	55	98.1818	7.29	8.04	up	1.67
ENSG00000075945	66	90	73.3333	5.29	6.03	up	1.67
ENSG00000089123	39	47	82.9787	5.83	6.57	up	1.67
ENSG00000090621	67	72	93.0556	7.55	8.29	up	1.67
ENSG00000091140	63	63	100	8.04	8.78	up	1.67
ENSG00000092020	43	70	61.4286	5.87	6.6	up	1.67
ENSG00000095485	60	63	95.2381	7.04	7.78	up	1.67
ENSG00000100296	85	94	90.4255	7.18	7.91	up	1.67
ENSG00000101181	43	51	84.3137	6.22	6.96	up	1.67
ENSG00000101190	33	39	84.6154	6.32	7.07	up	1.67
ENSG00000101464	42	48	87.5	6.97	7.71	up	1.67
ENSG00000105948	52	83	62.6506	5.52	6.26	up	1.67
ENSG00000113593	53	54	98.1481	6.11	6.85	up	1.67
ENSG00000114988	33	40	82.5	5.99	6.73	up	1.67
ENSG00000116406	104	118	88.1356	5.6	6.34	up	1.67
ENSG00000119125	90	106	84.9057	6.9	7.64	up	1.67
ENSG00000122435	34	49	69.3878	5.53	6.27	up	1.67
ENSG00000125485	64	89	71.9101	5.81	6.55	up	1.67
ENSG00000130766	26	46	56.5217	5.67	6.41	up	1.67
ENSG00000132676	43	45	95.5556	7.21	7.95	up	1.67
ENSG00000134014	81	82	98.7805	7.26	8	up	1.67
ENSG00000138050	54	67	80.597	5.73	6.47	up	1.67
ENSG00000141580	12	14	85.7143	7.98	8.72	up	1.67
ENSG00000149716	25	32	78.125	5.38	6.13	up	1.67
ENSG00000152683	59	62	95.1613	6.73	7.46	up	1.67
ENSG00000158006	36	52	69.2308	6.29	7.03	up	1.67
ENSG00000164609	53	57	92.9825	6.16	6.9	up	1.67
ENSG00000166848	21	26	80.7692	6.61	7.35	up	1.67
ENSG00000167461	45	47	95.7447	7.3	8.04	up	1.67
ENSG00000172113	16	25	64	5.14	5.87	up	1.67
ENSG00000173653	37	49	75.5102	6.65	7.4	up	1.67
ENSG00000179152	52	70	74.2857	5.65	6.4	up	1.67
ENSG00000182457	32	32	100	6.54	7.28	up	1.67
ENSG00000184470	40	71	56.338	5.81	6.55	up	1.67
ENSG00000185950	14	45	31.1111	5.37	6.12	up	1.67
ENSG00000196505	52	63	82.5397	6.05	6.8	up	1.67
ENSG00000196922	14	14	100	5.38	6.12	up	1.67
ENSG00000197586	75	80	93.75	6.46	7.2	up	1.67
ENSG00000197969	247	299	82.6087	5.54	6.29	up	1.67
ENSG00000005700	116	133	87.218	6.24	6.97	up	1.66
ENSG00000025800	54	56	96.4286	7.14	7.87	up	1.66
ENSG00000028203	45	57	78.9474	5.95	6.68	up	1.66
ENSG00000033867	113	131	86.2595	6.02	6.76	up	1.66
ENSG00000036054	60	72	83.3333	5.39	6.12	up	1.66
ENSG00000073536	38	48	79.1667	6.17	6.9	up	1.66
ENSG00000073792	18	18	100	7.26	8	up	1.66
ENSG00000093222	30	55	54.5455	4.75	5.49	up	1.66
ENSG00000107929	89	89	100	7.13	7.86	up	1.66
ENSG00000119402	41	51	80.3922	7.1	7.83	up	1.66
ENSG00000122068	48	49	97.9592	7.39	8.12	up	1.66
ENSG00000124487	61	68	89.7059	8.23	8.96	up	1.66
ENSG00000125458	15	23	65.2174	6.55	7.28	up	1.66
ENSG00000141012	42	55	76.3636	6.34	7.07	up	1.66
ENSG00000141560	39	40	97.5	7.07	7.8	up	1.66
ENSG00000144840	16	16	100	7.29	8.02	up	1.66
ENSG00000156875	57	58	98.2759	6.7	7.43	up	1.66
ENSG00000160221	33	36	91.6667	6.92	7.65	up	1.66
ENSG00000161513	37	55	67.2727	6.48	7.21	up	1.66
ENSG00000164930	60	64	93.75	6.95	7.67	up	1.66
ENSG00000168615	90	91	98.9011	8.12	8.85	up	1.66
ENSG00000172167	73	93	78.4946	5.28	6.01	up	1.66
ENSG00000176953	27	32	84.375	5.9	6.62	up	1.66
ENSG00000184056	78	90	86.6667	5.86	6.59	up	1.66
ENSG00000186566	78	84	92.8571	5.98	6.71	up	1.66
ENSG00000197045	18	20	90	7.35	8.08	up	1.66
ENSG00000010322	87	124	70.1613	6.06	6.79	up	1.65
ENSG00000051825	97	116	83.6207	5.77	6.49	up	1.65
ENSG00000055044	49	50	98	8.04	8.76	up	1.65
ENSG00000067900	90	111	81.0811	6.2	6.92	up	1.65
ENSG00000080189	40	48	83.3333	6.65	7.38	up	1.65
ENSG00000080819	34	34	100	7.73	8.45	up	1.65
ENSG00000087008	50	78	64.1026	5.61	6.33	up	1.65
ENSG00000099246	43	44	97.7273	7.19	7.91	up	1.65
ENSG00000100461	56	60	93.3333	6.32	7.04	up	1.65
ENSG00000104365	75	109	68.8073	5.78	6.5	up	1.65
ENSG00000107815	47	52	90.3846	6.43	7.16	up	1.65
ENSG00000108107	20	23	86.9565	7.43	8.15	up	1.65
ENSG00000116663	25	32	78.125	6.19	6.91	up	1.65
ENSG00000116874	25	36	69.4444	5.29	6.01	up	1.65
ENSG00000119636	13	31	41.9355	4.76	5.49	up	1.65
ENSG00000124299	33	34	97.0588	7.1	7.81	up	1.65
ENSG00000127452	13	26	50	5.69	6.41	up	1.65
ENSG00000128595	43	46	93.4783	6.98	7.7	up	1.65
ENSG00000130540	23	44	52.2727	4.83	5.55	up	1.65
ENSG00000135297	58	72	80.5556	6.3	7.02	up	1.65
ENSG00000142632	46	61	75.4098	5.98	6.7	up	1.65
ENSG00000143178	17	41	41.4634	4.95	5.68	up	1.65
ENSG00000147789	24	37	64.8649	6.03	6.75	up	1.65
ENSG00000148516	26	64	40.625	4.98	5.71	up	1.65
ENSG00000151116	53	60	88.3333	6.04	6.76	up	1.65
ENSG00000151292	55	64	85.9375	6.3	7.02	up	1.65
ENSG00000155878	15	16	93.75	6.91	7.63	up	1.65
ENSG00000158405	45	60	75	5.58	6.3	up	1.65
ENSG00000164597	89	104	85.5769	6.47	7.2	up	1.65
ENSG00000167193	19	20	95	7.15	7.86	up	1.65
ENSG00000171566	59	61	96.7213	8.63	9.35	up	1.65
ENSG00000172954	42	45	93.3333	6.7	7.43	up	1.65
ENSG00000179051	28	29	96.5517	7.86	8.58	up	1.65
ENSG00000183077	31	46	67.3913	6.99	7.72	up	1.65
ENSG00000186908	63	82	76.8293	5.88	6.59	up	1.65
ENSG00000197746	78	79	98.7342	8.79	9.51	up	1.65
ENSG00000078070	60	73	82.1918	5.53	6.25	up	1.64
ENSG00000107951	50	51	98.0392	6.63	7.34	up	1.64
ENSG00000112146	53	62	85.4839	7.16	7.87	up	1.64
ENSG00000114062	53	62	85.4839	6.04	6.76	up	1.64
ENSG00000115254	42	42	100	7.45	8.16	up	1.64
ENSG00000121716	24	30	80	5.67	6.37	up	1.64
ENSG00000124226	41	44	93.1818	6.99	7.7	up	1.64
ENSG00000124459	23	31	74.1935	5.31	6.03	up	1.64
ENSG00000125351	31	47	65.9574	5.5	6.21	up	1.64
ENSG00000126226	73	83	87.9518	6.79	7.51	up	1.64
ENSG00000128342	12	12	100	6.42	7.14	up	1.64
ENSG00000132906	31	36	86.1111	5.49	6.2	up	1.64
ENSG00000135241	48	53	90.566	5.45	6.16	up	1.64
ENSG00000138669	36	73	49.3151	4.56	5.27	up	1.64
ENSG00000139624	43	54	79.6296	6.42	7.13	up	1.64
ENSG00000142002	71	86	82.5581	7.18	7.89	up	1.64
ENSG00000142945	81	94	86.1702	6.79	7.51	up	1.64
ENSG00000149182	45	54	83.3333	6.28	6.99	up	1.64
ENSG00000151575	20	44	45.4545	4.92	5.63	up	1.64
ENSG00000158604	26	28	92.8571	7.15	7.85	up	1.64
ENSG00000158773	40	48	83.3333	6.53	7.24	up	1.64
ENSG00000161551	12	32	37.5	4.92	5.63	up	1.64
ENSG00000162496	31	37	83.7838	6.77	7.48	up	1.64
ENSG00000163728	57	66	86.3636	5.53	6.24	up	1.64
ENSG00000166750	50	67	74.6269	5.26	5.98	up	1.64
ENSG00000172901	39	118	33.0508	4.39	5.1	up	1.64
ENSG00000182372	24	32	75	5.43	6.15	up	1.64
ENSG00000182446	79	87	90.8046	7.6	8.31	up	1.64
ENSG00000183255	20	21	95.2381	7.68	8.4	up	1.64
ENSG00000196878	71	97	73.1959	6.01	6.73	up	1.64
ENSG00000197121	76	114	66.6667	4.9	5.61	up	1.64
ENSG00000198925	33	36	91.6667	7.46	8.17	up	1.64
ENSG00000003509	49	61	80.3279	6.24	6.95	up	1.63
ENSG00000031003	75	101	74.2574	5.41	6.12	up	1.63
ENSG00000066651	37	39	94.8718	6.15	6.86	up	1.63
ENSG00000069956	14	16	87.5	7.01	7.71	up	1.63
ENSG00000072415	61	75	81.3333	5.8	6.5	up	1.63
ENSG00000075234	39	47	82.9787	5.81	6.51	up	1.63
ENSG00000079387	75	82	91.4634	5.9	6.6	up	1.63
ENSG00000089057	86	106	81.1321	5.49	6.19	up	1.63
ENSG00000095564	144	163	88.3436	6.09	6.8	up	1.63
ENSG00000112210	28	35	80	5.87	6.57	up	1.63
ENSG00000112339	92	98	93.8776	6.91	7.62	up	1.63
ENSG00000113048	46	47	97.8723	7.43	8.14	up	1.63
ENSG00000114030	84	95	88.4211	6.62	7.32	up	1.63
ENSG00000115520	26	29	89.6552	6.68	7.38	up	1.63
ENSG00000117984	37	40	92.5	7.08	7.78	up	1.63
ENSG00000120008	133	149	89.2617	6.01	6.72	up	1.63
ENSG00000124786	49	77	63.6364	5.95	6.65	up	1.63
ENSG00000135632	60	66	90.9091	6.2	6.9	up	1.63
ENSG00000135702	20	44	45.4545	5.05	5.76	up	1.63
ENSG00000135749	43	81	53.0864	4.98	5.68	up	1.63
ENSG00000138459	37	41	90.2439	6.08	6.79	up	1.63
ENSG00000138678	43	49	87.7551	7.01	7.71	up	1.63
ENSG00000162144	33	42	78.5714	6.55	7.26	up	1.63
ENSG00000164118	30	51	58.8235	5	5.71	up	1.63
ENSG00000165661	55	61	90.1639	6.13	6.83	up	1.63
ENSG00000172992	26	33	78.7879	6	6.71	up	1.63
ENSG00000174943	23	31	74.1935	5.54	6.24	up	1.63
ENSG00000176700	24	42	57.1429	4.67	5.38	up	1.63
ENSG00000183354	37	48	77.0833	5.72	6.42	up	1.63
ENSG00000183597	36	62	58.0645	5.82	6.53	up	1.63
ENSG00000188725	21	22	95.4545	7.28	7.99	up	1.63
ENSG00000198373	89	101	88.1188	5.77	6.47	up	1.63
ENSG00000003402	44	52	84.6154	5.96	6.65	up	1.62
ENSG00000006715	81	91	89.011	6.54	7.24	up	1.62
ENSG00000067182	59	69	85.5072	7.18	7.88	up	1.62
ENSG00000072274	87	87	100	8.49	9.19	up	1.62
ENSG00000075856	73	76	96.0526	7.18	7.88	up	1.62
ENSG00000090054	64	80	80	7.62	8.32	up	1.62
ENSG00000105552	40	48	83.3333	6.93	7.63	up	1.62
ENSG00000108395	93	96	96.875	6.84	7.54	up	1.62
ENSG00000108861	23	27	85.1852	6.66	7.36	up	1.62
ENSG00000110031	24	48	50	4.66	5.35	up	1.62
ENSG00000110422	75	76	98.6842	6.45	7.15	up	1.62
ENSG00000111802	39	48	81.25	7.24	7.94	up	1.62
ENSG00000112855	47	53	88.6792	6.84	7.53	up	1.62
ENSG00000114544	62	71	87.3239	6.33	7.02	up	1.62
ENSG00000114742	92	98	93.8776	6.31	7.01	up	1.62
ENSG00000118965	100	124	80.6452	5.26	5.95	up	1.62
ENSG00000119471	43	50	86	6.5	7.19	up	1.62
ENSG00000119688	53	85	62.3529	5.42	6.11	up	1.62
ENSG00000124789	93	96	96.875	6.8	7.49	up	1.62
ENSG00000129472	46	50	92	6.02	6.71	up	1.62
ENSG00000132256	20	38	52.6316	5.97	6.66	up	1.62
ENSG00000133313	63	76	82.8947	6.4	7.1	up	1.62
ENSG00000133872	29	33	87.8788	7.93	8.62	up	1.62
ENSG00000140650	35	46	76.087	5.97	6.67	up	1.62
ENSG00000143207	58	64	90.625	6.04	6.73	up	1.62
ENSG00000145388	45	47	95.7447	6.08	6.77	up	1.62
ENSG00000156345	27	69	39.1304	5.1	5.79	up	1.62
ENSG00000162086	18	34	52.9412	5.08	5.78	up	1.62
ENSG00000162869	62	77	80.5195	5.39	6.08	up	1.62
ENSG00000163093	27	48	56.25	4.86	5.55	up	1.62
ENSG00000163512	47	56	83.9286	6.12	6.82	up	1.62
ENSG00000163946	109	120	90.8333	5.99	6.69	up	1.62
ENSG00000164066	35	63	55.5556	5.03	5.72	up	1.62
ENSG00000164211	34	38	89.4737	6.87	7.57	up	1.62
ENSG00000164654	57	68	83.8235	5.82	6.51	up	1.62
ENSG00000165895	13	13	100	6.49	7.18	up	1.62
ENSG00000166266	93	104	89.4231	6.02	6.72	up	1.62
ENSG00000169359	32	36	88.8889	6.91	7.6	up	1.62
ENSG00000183826	72	122	59.0164	5.18	5.87	up	1.62
ENSG00000184047	40	53	75.4717	6.73	7.43	up	1.62
ENSG00000197585	20	25	80	5.15	5.84	up	1.62
ENSG00000198863	20	27	74.0741	5.83	6.53	up	1.62
ENSG00000014824	72	74	97.2973	6.66	7.34	up	1.61
ENSG00000019995	48	49	97.9592	6.62	7.31	up	1.61
ENSG00000078902	38	46	82.6087	5.84	6.53	up	1.61
ENSG00000100372	34	42	80.9524	6.19	6.88	up	1.61
ENSG00000105671	53	70	75.7143	6.58	7.27	up	1.61
ENSG00000105976	122	125	97.6	8.01	8.69	up	1.61
ENSG00000112701	88	93	94.6237	6.37	7.06	up	1.61
ENSG00000113761	31	41	75.6098	5.7	6.39	up	1.61
ENSG00000114098	87	109	79.8165	6.1	6.78	up	1.61
ENSG00000119801	25	38	65.7895	5.65	6.34	up	1.61
ENSG00000125676	129	141	91.4894	6.29	6.98	up	1.61
ENSG00000134324	71	99	71.7172	5.79	6.47	up	1.61
ENSG00000135205	41	95	43.1579	4.72	5.4	up	1.61
ENSG00000135541	92	126	73.0159	5.62	6.3	up	1.61
ENSG00000138095	153	159	96.2264	7.87	8.56	up	1.61
ENSG00000138119	190	197	96.4467	7.68	8.37	up	1.61
ENSG00000138286	21	25	84	5.72	6.41	up	1.61
ENSG00000143748	91	107	85.0467	5.95	6.64	up	1.61
ENSG00000155096	74	75	98.6667	7.86	8.55	up	1.61
ENSG00000164631	28	41	68.2927	5.12	5.8	up	1.61
ENSG00000166123	48	69	69.5652	6.32	7.01	up	1.61
ENSG00000166224	57	58	98.2759	7.34	8.03	up	1.61
ENSG00000166548	39	60	65	6.01	6.7	up	1.61
ENSG00000167778	33	37	89.1892	6.36	7.05	up	1.61
ENSG00000169696	33	71	46.4789	5.93	6.61	up	1.61
ENSG00000173681	33	53	62.2642	4.72	5.41	up	1.61
ENSG00000174606	52	59	88.1356	5.77	6.46	up	1.61
ENSG00000177000	19	52	36.5385	5.03	5.71	up	1.61
ENSG00000185722	96	108	88.8889	6.22	6.91	up	1.61
ENSG00000035115	42	61	68.8525	5.39	6.07	up	1.6
ENSG00000079785	84	92	91.3043	8.17	8.85	up	1.6
ENSG00000089597	97	98	98.9796	8.04	8.72	up	1.6
ENSG00000100147	20	24	83.3333	6.1	6.78	up	1.6
ENSG00000103248	37	51	72.549	5.37	6.05	up	1.6
ENSG00000106366	25	39	64.1026	5.86	6.54	up	1.6
ENSG00000109452	83	105	79.0476	5.78	6.46	up	1.6
ENSG00000111144	71	80	88.75	7.78	8.47	up	1.6
ENSG00000112305	38	78	48.7179	4.98	5.66	up	1.6
ENSG00000112473	37	37	100	7.45	8.12	up	1.6
ENSG00000113318	70	103	67.9612	4.91	5.59	up	1.6
ENSG00000113638	21	24	87.5	5.6	6.28	up	1.6
ENSG00000116741	24	24	100	7.48	8.15	up	1.6
ENSG00000121903	35	59	59.322	5.17	5.85	up	1.6
ENSG00000122299	84	92	91.3043	5.8	6.48	up	1.6
ENSG00000125871	41	44	93.1818	6.72	7.4	up	1.6
ENSG00000126777	128	137	93.4307	6.48	7.16	up	1.6
ENSG00000132603	14	14	100	8.75	9.43	up	1.6
ENSG00000136527	92	98	93.8776	7.33	8	up	1.6
ENSG00000137376	17	24	70.8333	6.56	7.23	up	1.6
ENSG00000138750	56	65	86.1538	6.72	7.4	up	1.6
ENSG00000142046	40	52	76.9231	6.32	7	up	1.6
ENSG00000142871	20	30	66.6667	5.8	6.48	up	1.6
ENSG00000144455	39	55	70.9091	5.92	6.6	up	1.6
ENSG00000147642	31	36	86.1111	5.75	6.42	up	1.6
ENSG00000152359	47	55	85.4545	6.44	7.11	up	1.6
ENSG00000156011	70	87	80.4598	5.82	6.5	up	1.6
ENSG00000157259	26	32	81.25	6.46	7.13	up	1.6
ENSG00000160917	38	42	90.4762	7	7.68	up	1.6
ENSG00000161395	15	35	42.8571	5	5.68	up	1.6
ENSG00000163703	23	51	45.098	5.41	6.09	up	1.6
ENSG00000166881	44	46	95.6522	6.25	6.93	up	1.6
ENSG00000166887	109	121	90.0826	5.85	6.53	up	1.6
ENSG00000168256	33	38	86.8421	6.52	7.19	up	1.6
ENSG00000168883	70	76	92.1053	7.33	8.01	up	1.6
ENSG00000171097	36	57	63.1579	5.27	5.95	up	1.6
ENSG00000171720	65	68	95.5882	7.7	8.38	up	1.6
ENSG00000175066	46	61	75.4098	5.63	6.31	up	1.6
ENSG00000186298	47	48	97.9167	9.19	9.87	up	1.6
ENSG00000196652	61	84	72.619	5.55	6.23	up	1.6
ENSG00000197879	111	120	92.5	7.2	7.88	up	1.6
ENSG00000006194	31	45	68.8889	5.81	6.48	up	1.59
ENSG00000021762	50	76	65.7895	6.24	6.9	up	1.59
ENSG00000022840	60	60	100	7.36	8.03	up	1.59
ENSG00000064545	47	57	82.4561	7.08	7.75	up	1.59
ENSG00000070269	64	80	80	5.63	6.3	up	1.59
ENSG00000081386	18	31	58.0645	4.71	5.38	up	1.59
ENSG00000103249	60	94	63.8298	5.81	6.49	up	1.59
ENSG00000105355	44	45	97.7778	7.78	8.45	up	1.59
ENSG00000108264	57	65	87.6923	5.72	6.39	up	1.59
ENSG00000108306	41	55	74.5455	5.48	6.15	up	1.59
ENSG00000109736	45	61	73.7705	6.82	7.49	up	1.59
ENSG00000116954	49	53	92.4528	5.67	6.34	up	1.59
ENSG00000117305	39	43	90.6977	6.63	7.3	up	1.59
ENSG00000118507	14	50	28	4.73	5.4	up	1.59
ENSG00000120159	42	56	75	6.07	6.74	up	1.59
ENSG00000125695	44	70	62.8571	5.77	6.43	up	1.59
ENSG00000128694	36	46	78.2609	5.63	6.3	up	1.59
ENSG00000128915	80	103	77.6699	6.45	7.12	up	1.59
ENSG00000128923	36	44	81.8182	5.15	5.82	up	1.59
ENSG00000128928	54	62	87.0968	6.44	7.11	up	1.59
ENSG00000131238	31	34	91.1765	7.18	7.85	up	1.59
ENSG00000135932	32	33	96.9697	7.09	7.76	up	1.59
ENSG00000137463	19	28	67.8571	4.86	5.53	up	1.59
ENSG00000138640	63	91	69.2308	5.46	6.12	up	1.59
ENSG00000141965	12	16	75	7.02	7.69	up	1.59
ENSG00000146802	40	42	95.2381	5.63	6.3	up	1.59
ENSG00000147533	24	27	88.8889	7.87	8.54	up	1.59
ENSG00000154124	32	40	80	5.47	6.14	up	1.59
ENSG00000156873	31	45	68.8889	6.15	6.82	up	1.59
ENSG00000157538	31	63	49.2063	6.58	7.25	up	1.59
ENSG00000159082	104	150	69.3333	5.18	5.85	up	1.59
ENSG00000159592	61	66	92.4242	6.74	7.4	up	1.59
ENSG00000163013	43	75	57.3333	5.77	6.43	up	1.59
ENSG00000163517	22	38	57.8947	5.25	5.92	up	1.59
ENSG00000166275	30	68	44.1176	5.25	5.92	up	1.59
ENSG00000166592	12	29	41.3793	5.09	5.76	up	1.59
ENSG00000171160	18	28	64.2857	5.41	6.08	up	1.59
ENSG00000174720	46	57	80.7018	6.29	6.96	up	1.59
ENSG00000198093	13	20	65	4.86	5.54	up	1.59
ENSG00000023445	25	39	64.1026	5.57	6.23	up	1.58
ENSG00000065883	76	107	71.028	5.87	6.53	up	1.58
ENSG00000070882	96	119	80.6723	6.26	6.92	up	1.58
ENSG00000078369	61	65	93.8462	8.97	9.63	up	1.58
ENSG00000083842	12	27	44.4444	5.06	5.72	up	1.58
ENSG00000100412	36	37	97.2973	7.7	8.36	up	1.58
ENSG00000104643	37	46	80.4348	5.6	6.26	up	1.58
ENSG00000105738	55	79	69.6203	5.96	6.62	up	1.58
ENSG00000112200	58	68	85.2941	5.86	6.53	up	1.58
ENSG00000121542	35	36	97.2222	6.06	6.72	up	1.58
ENSG00000121897	42	51	82.3529	6.05	6.71	up	1.58
ENSG00000126091	32	65	49.2308	4.96	5.62	up	1.58
ENSG00000130803	38	55	69.0909	6.13	6.79	up	1.58
ENSG00000131375	96	106	90.566	5.92	6.58	up	1.58
ENSG00000131480	19	32	59.375	4.93	5.59	up	1.58
ENSG00000133835	76	80	95	7.15	7.81	up	1.58
ENSG00000135040	61	63	96.8254	6.78	7.45	up	1.58
ENSG00000137693	21	23	91.3043	6.98	7.64	up	1.58
ENSG00000137992	35	45	77.7778	5.97	6.63	up	1.58
ENSG00000141446	42	53	79.2453	5.83	6.49	up	1.58
ENSG00000149311	210	270	77.7778	5.26	5.92	up	1.58
ENSG00000151233	28	32	87.5	5.58	6.24	up	1.58
ENSG00000155256	35	52	67.3077	5.32	5.98	up	1.58
ENSG00000160439	22	36	61.1111	6.03	6.69	up	1.58
ENSG00000163349	64	68	94.1176	6.37	7.03	up	1.58
ENSG00000167785	19	24	79.1667	5.43	6.09	up	1.58
ENSG00000169045	41	54	75.9259	8.13	8.78	up	1.58
ENSG00000176142	41	48	85.4167	6.6	7.26	up	1.58
ENSG00000180715	24	25	96	7	7.66	up	1.58
ENSG00000185033	48	76	63.1579	6.21	6.87	up	1.58
ENSG00000188419	56	76	73.6842	5.72	6.37	up	1.58
ENSG00000189311	54	58	93.1034	7.53	8.2	up	1.58
ENSG00000196085	32	39	82.0513	7.75	8.4	up	1.58
ENSG00000196182	36	51	70.5882	6.07	6.73	up	1.58
ENSG00000006327	18	20	90	7.85	8.5	up	1.57
ENSG00000007168	47	49	95.9184	7.27	7.93	up	1.57
ENSG00000028310	54	87	62.069	5.52	6.17	up	1.57
ENSG00000028528	66	73	90.411	6.4	7.05	up	1.57
ENSG00000058799	37	39	94.8718	6.21	6.86	up	1.57
ENSG00000071282	16	32	50	5.3	5.95	up	1.57
ENSG00000093144	35	41	85.3659	7.83	8.49	up	1.57
ENSG00000100601	40	40	100	6.22	6.87	up	1.57
ENSG00000100731	165	177	93.2203	6.53	7.18	up	1.57
ENSG00000103365	79	98	80.6122	6.59	7.24	up	1.57
ENSG00000103502	32	35	91.4286	7.79	8.44	up	1.57
ENSG00000105612	20	25	80	5.99	6.64	up	1.57
ENSG00000115750	51	64	79.6875	6.05	6.7	up	1.57
ENSG00000115942	67	72	93.0556	6.44	7.09	up	1.57
ENSG00000116478	44	44	100	8.37	9.02	up	1.57
ENSG00000116704	38	42	90.4762	5.93	6.58	up	1.57
ENSG00000117054	54	60	90	7.41	8.07	up	1.57
ENSG00000117419	33	36	91.6667	7.17	7.83	up	1.57
ENSG00000118162	34	52	65.3846	5.66	6.31	up	1.57
ENSG00000119638	92	101	91.0891	6.33	6.98	up	1.57
ENSG00000119927	75	92	81.5217	5.81	6.46	up	1.57
ENSG00000127837	51	61	83.6066	7.63	8.28	up	1.57
ENSG00000129315	40	40	100	6.99	7.64	up	1.57
ENSG00000129474	30	38	78.9474	6.27	6.92	up	1.57
ENSG00000129691	57	60	95	7.09	7.74	up	1.57
ENSG00000130684	21	40	52.5	5.32	5.97	up	1.57
ENSG00000132950	30	47	63.8298	5.06	5.7	up	1.57
ENSG00000135924	33	52	63.4615	5.99	6.64	up	1.57
ENSG00000137700	52	74	70.2703	6.84	7.48	up	1.57
ENSG00000142528	66	81	81.4815	5.65	6.3	up	1.57
ENSG00000144357	102	124	82.2581	5.79	6.44	up	1.57
ENSG00000145715	86	102	84.3137	5.98	6.63	up	1.57
ENSG00000146530	53	76	69.7368	5.33	5.99	up	1.57
ENSG00000148358	82	96	85.4167	6.34	6.99	up	1.57
ENSG00000148814	28	94	29.7872	4.93	5.57	up	1.57
ENSG00000153130	12	18	66.6667	7.09	7.74	up	1.57
ENSG00000156697	25	29	86.2069	6.64	7.29	up	1.57
ENSG00000158863	53	91	58.2418	5.84	6.49	up	1.57
ENSG00000163053	35	41	85.3659	5.75	6.4	up	1.57
ENSG00000163785	42	43	97.6744	7.32	7.97	up	1.57
ENSG00000163808	107	123	86.9919	5.23	5.88	up	1.57
ENSG00000166166	16	31	51.6129	5.54	6.19	up	1.57
ENSG00000167524	19	30	63.3333	5.09	5.74	up	1.57
ENSG00000167671	40	48	83.3333	6.74	7.39	up	1.57
ENSG00000196712	151	199	75.8794	5.22	5.88	up	1.57
ENSG00000197562	14	26	53.8462	5.36	6	up	1.57
ENSG00000197936	23	36	63.8889	5.56	6.21	up	1.57
ENSG00000198189	35	36	97.2222	7.49	8.14	up	1.57
ENSG00000003436	37	50	74	5.68	6.32	up	1.56
ENSG00000062194	68	69	98.5507	6.54	7.19	up	1.56
ENSG00000066422	56	61	91.8033	6.16	6.8	up	1.56
ENSG00000070669	29	34	85.2941	7.88	8.52	up	1.56
ENSG00000075089	51	61	83.6066	6.38	7.02	up	1.56
ENSG00000080823	43	101	42.5743	5.12	5.76	up	1.56
ENSG00000083457	29	123	23.5772	7.08	7.72	up	1.56
ENSG00000084652	62	74	83.7838	6.32	6.97	up	1.56
ENSG00000093100	70	115	60.8696	5.7	6.34	up	1.56
ENSG00000095480	41	52	78.8462	6.74	7.38	up	1.56
ENSG00000100201	106	109	97.2477	7.59	8.22	up	1.56
ENSG00000103245	29	61	47.541	5.65	6.29	up	1.56
ENSG00000105447	38	49	77.551	7.08	7.72	up	1.56
ENSG00000108654	98	98	100	7.98	8.62	up	1.56
ENSG00000110583	36	40	90	6.08	6.72	up	1.56
ENSG00000111300	81	98	82.6531	6.09	6.74	up	1.56
ENSG00000112144	62	79	78.481	5.72	6.36	up	1.56
ENSG00000114626	21	58	36.2069	5.14	5.79	up	1.56
ENSG00000114796	40	63	63.4921	5.12	5.76	up	1.56
ENSG00000115392	51	56	91.0714	6.36	7	up	1.56
ENSG00000115760	320	355	90.1408	6.38	7.02	up	1.56
ENSG00000115839	100	107	93.4579	6.8	7.45	up	1.56
ENSG00000119689	23	23	100	7.14	7.78	up	1.56
ENSG00000126773	55	60	91.6667	6.41	7.06	up	1.56
ENSG00000127481	431	468	92.094	6.65	7.29	up	1.56
ENSG00000129473	18	20	90	6.04	6.68	up	1.56
ENSG00000131323	36	39	92.3077	6.33	6.97	up	1.56
ENSG00000132879	26	31	83.871	6.24	6.88	up	1.56
ENSG00000136273	41	46	89.1304	6.83	7.48	up	1.56
ENSG00000139974	46	67	68.6567	5.21	5.86	up	1.56
ENSG00000140694	68	72	94.4444	6.93	7.57	up	1.56
ENSG00000145391	35	39	89.7436	7.23	7.87	up	1.56
ENSG00000146143	22	29	75.8621	6.09	6.73	up	1.56
ENSG00000146842	64	67	95.5224	6.67	7.32	up	1.56
ENSG00000150756	19	24	79.1667	5.82	6.46	up	1.56
ENSG00000151353	28	38	73.6842	6.85	7.49	up	1.56
ENSG00000151498	44	73	60.274	5.84	6.48	up	1.56
ENSG00000151914	366	405	90.3704	6.14	6.78	up	1.56
ENSG00000155621	12	13	92.3077	6.09	6.73	up	1.56
ENSG00000162927	33	60	55	4.93	5.57	up	1.56
ENSG00000163697	72	82	87.8049	7.01	7.66	up	1.56
ENSG00000164828	98	122	80.3279	6.33	6.96	up	1.56
ENSG00000165914	65	75	86.6667	6.63	7.27	up	1.56
ENSG00000166233	66	68	97.0588	7.51	8.16	up	1.56
ENSG00000169682	41	53	77.3585	6.62	7.26	up	1.56
ENSG00000170631	19	37	51.3514	5.45	6.09	up	1.56
ENSG00000172780	36	50	72	6.32	6.96	up	1.56
ENSG00000173230	110	135	81.4815	5.7	6.34	up	1.56
ENSG00000178467	45	70	64.2857	6.29	6.94	up	1.56
ENSG00000186376	21	39	53.8462	4.65	5.28	up	1.56
ENSG00000032389	47	86	54.6512	6.55	7.19	up	1.55
ENSG00000048471	27	51	52.9412	5.38	6.01	up	1.55
ENSG00000055609	222	266	83.4586	5.6	6.23	up	1.55
ENSG00000072803	45	57	78.9474	7.01	7.65	up	1.55
ENSG00000075223	67	80	83.75	5.8	6.43	up	1.55
ENSG00000081019	31	40	77.5	5.58	6.22	up	1.55
ENSG00000082898	93	102	91.1765	7.71	8.34	up	1.55
ENSG00000083750	29	46	63.0435	5.24	5.87	up	1.55
ENSG00000088298	30	47	63.8298	5.65	6.28	up	1.55
ENSG00000103479	80	102	78.4314	5.54	6.17	up	1.55
ENSG00000104679	28	46	60.8696	6.09	6.72	up	1.55
ENSG00000105402	51	52	98.0769	7.32	7.96	up	1.55
ENSG00000107745	40	49	81.6327	6.04	6.67	up	1.55
ENSG00000108424	80	81	98.7654	8.6	9.23	up	1.55
ENSG00000108510	140	145	96.5517	7.33	7.97	up	1.55
ENSG00000108799	56	76	73.6842	5.36	6	up	1.55
ENSG00000110721	49	54	90.7407	5.93	6.56	up	1.55
ENSG00000114698	17	41	41.4634	4.69	5.32	up	1.55
ENSG00000115840	73	78	93.5897	5.92	6.55	up	1.55
ENSG00000116151	19	54	35.1852	5.14	5.77	up	1.55
ENSG00000116688	98	103	95.1456	7.44	8.06	up	1.55
ENSG00000130023	62	80	77.5	5.89	6.53	up	1.55
ENSG00000132953	101	110	91.8182	6.48	7.11	up	1.55
ENSG00000133302	27	42	64.2857	5.13	5.76	up	1.55
ENSG00000134294	88	88	100	9.29	9.92	up	1.55
ENSG00000134882	67	85	78.8235	6.72	7.35	up	1.55
ENSG00000135249	71	82	86.5854	6.15	6.78	up	1.55
ENSG00000135457	47	52	90.3846	6.47	7.1	up	1.55
ENSG00000136243	32	43	74.4186	5.84	6.47	up	1.55
ENSG00000140740	53	62	85.4839	8.7	9.33	up	1.55
ENSG00000143797	38	47	80.8511	5.39	6.02	up	1.55
ENSG00000145495	118	120	98.3333	7.4	8.03	up	1.55
ENSG00000147010	59	71	83.0986	7.14	7.77	up	1.55
ENSG00000147099	44	54	81.4815	6.09	6.73	up	1.55
ENSG00000151917	13	32	40.625	5.24	5.87	up	1.55
ENSG00000155542	26	44	59.0909	5.57	6.21	up	1.55
ENSG00000159176	34	42	80.9524	6.86	7.49	up	1.55
ENSG00000160058	57	74	77.027	6.36	6.99	up	1.55
ENSG00000163659	41	51	80.3922	7.04	7.67	up	1.55
ENSG00000165678	43	44	97.7273	8.26	8.89	up	1.55
ENSG00000170242	121	151	80.1325	5.66	6.29	up	1.55
ENSG00000170903	30	32	93.75	6.22	6.86	up	1.55
ENSG00000171109	65	67	97.0149	6.21	6.84	up	1.55
ENSG00000172671	56	71	78.8732	5.6	6.22	up	1.55
ENSG00000177951	23	28	82.1429	6.4	7.04	up	1.55
ENSG00000185480	58	75	77.3333	5.61	6.25	up	1.55
ENSG00000186814	12	27	44.4444	5.08	5.71	up	1.55
ENSG00000197912	63	85	74.1176	6.18	6.8	up	1.55
ENSG00000198265	133	138	96.3768	6.34	6.97	up	1.55
ENSG00000198898	12	12	100	7.95	8.59	up	1.55
ENSG00000198945	78	82	95.122	6.5	7.13	up	1.55
ENSG00000004766	80	117	68.3761	5.09	5.71	up	1.54
ENSG00000005486	30	32	93.75	7.89	8.51	up	1.54
ENSG00000006576	77	90	85.5556	6.08	6.7	up	1.54
ENSG00000011243	41	60	68.3333	7.09	7.72	up	1.54
ENSG00000032742	66	108	61.1111	5.35	5.97	up	1.54
ENSG00000041802	58	67	86.5672	6.22	6.85	up	1.54
ENSG00000043822	38	40	95	6.58	7.2	up	1.54
ENSG00000065665	43	56	76.7857	5.52	6.14	up	1.54
ENSG00000075213	74	75	98.6667	7.24	7.87	up	1.54
ENSG00000085719	65	68	95.5882	7.71	8.33	up	1.54
ENSG00000100084	96	102	94.1176	6.62	7.25	up	1.54
ENSG00000108591	43	57	75.4386	6.61	7.24	up	1.54
ENSG00000113328	52	56	92.8571	7.58	8.21	up	1.54
ENSG00000113583	23	32	71.875	6.36	6.98	up	1.54
ENSG00000117385	60	91	65.9341	6	6.62	up	1.54
ENSG00000130348	27	30	90	6.55	7.17	up	1.54
ENSG00000130764	35	36	97.2222	6.45	7.08	up	1.54
ENSG00000131374	70	82	85.3659	6.04	6.66	up	1.54
ENSG00000132768	41	47	87.234	6.59	7.21	up	1.54
ENSG00000137845	83	89	93.2584	7.11	7.73	up	1.54
ENSG00000138685	17	22	77.2727	5.6	6.22	up	1.54
ENSG00000140471	37	45	82.2222	5.44	6.07	up	1.54
ENSG00000141127	42	49	85.7143	6.83	7.45	up	1.54
ENSG00000143149	52	52	100	7.2	7.82	up	1.54
ENSG00000144741	44	56	78.5714	6.84	7.46	up	1.54
ENSG00000148343	28	74	37.8378	5.55	6.18	up	1.54
ENSG00000148399	48	58	82.7586	6.22	6.85	up	1.54
ENSG00000148841	27	45	60	6.03	6.64	up	1.54
ENSG00000152127	62	69	89.8551	6.39	7.01	up	1.54
ENSG00000152348	27	30	90	5.72	6.34	up	1.54
ENSG00000156502	59	60	98.3333	7.46	8.08	up	1.54
ENSG00000157211	24	63	38.0952	5.42	6.05	up	1.54
ENSG00000157796	106	158	67.0886	4.86	5.49	up	1.54
ENSG00000157869	20	33	60.6061	4.73	5.36	up	1.54
ENSG00000161904	36	57	63.1579	6.3	6.92	up	1.54
ENSG00000162032	19	36	52.7778	5.42	6.04	up	1.54
ENSG00000163832	36	48	75	5.95	6.57	up	1.54
ENSG00000169306	14	44	31.8182	4.74	5.37	up	1.54
ENSG00000169490	42	44	95.4545	6.64	7.26	up	1.54
ENSG00000170017	78	85	91.7647	7.22	7.84	up	1.54
ENSG00000174903	20	20	100	8.27	8.89	up	1.54
ENSG00000180611	19	22	86.3636	6.22	6.85	up	1.54
ENSG00000182606	93	128	72.6562	5.89	6.52	up	1.54
ENSG00000184197	20	20	100	7.06	7.68	up	1.54
ENSG00000003393	107	139	76.9784	5.75	6.36	up	1.53
ENSG00000006530	22	33	66.6667	7.4	8.01	up	1.53
ENSG00000025156	21	31	67.7419	6.22	6.83	up	1.53
ENSG00000052841	100	117	85.4701	5.95	6.56	up	1.53
ENSG00000055291	52	60	86.6667	6.81	7.42	up	1.53
ENSG00000077463	21	38	55.2632	6.19	6.8	up	1.53
ENSG00000087157	48	55	87.2727	6.52	7.14	up	1.53
ENSG00000088035	58	68	85.2941	5.78	6.39	up	1.53
ENSG00000092199	19	20	95	6.03	6.64	up	1.53
ENSG00000102805	28	38	73.6842	5.8	6.42	up	1.53
ENSG00000104228	16	30	53.3333	6	6.61	up	1.53
ENSG00000106692	37	51	72.549	5.17	5.78	up	1.53
ENSG00000108963	44	69	63.7681	6.44	7.06	up	1.53
ENSG00000109066	44	58	75.8621	6.13	6.74	up	1.53
ENSG00000109929	32	43	74.4186	7.79	8.41	up	1.53
ENSG00000117481	65	81	80.2469	6.91	7.53	up	1.53
ENSG00000119314	79	88	89.7727	7.59	8.21	up	1.53
ENSG00000121578	37	59	62.7119	5.52	6.13	up	1.53
ENSG00000123124	40	40	100	7.13	7.74	up	1.53
ENSG00000125249	22	26	84.6154	6.68	7.29	up	1.53
ENSG00000125826	42	59	71.1864	6.19	6.81	up	1.53
ENSG00000127774	15	18	83.3333	7.41	8.02	up	1.53
ENSG00000127804	64	71	90.1408	6.26	6.87	up	1.53
ENSG00000128845	51	79	64.557	4.94	5.56	up	1.53
ENSG00000129933	55	95	57.8947	6.04	6.65	up	1.53
ENSG00000133103	80	90	88.8889	6.06	6.68	up	1.53
ENSG00000136828	32	67	47.7612	5.13	5.75	up	1.53
ENSG00000138246	198	210	94.2857	6.01	6.63	up	1.53
ENSG00000141968	56	91	61.5385	6.12	6.73	up	1.53
ENSG00000143641	76	84	90.4762	6.66	7.27	up	1.53
ENSG00000148481	60	66	90.9091	6.13	6.74	up	1.53
ENSG00000148680	18	22	81.8182	5.79	6.41	up	1.53
ENSG00000151025	22	59	37.2881	5.13	5.74	up	1.53
ENSG00000156983	74	136	54.4118	5.92	6.54	up	1.53
ENSG00000164048	40	56	71.4286	5.11	5.73	up	1.53
ENSG00000164823	38	48	79.1667	6.35	6.97	up	1.53
ENSG00000165792	70	85	82.3529	7	7.61	up	1.53
ENSG00000166949	45	48	93.75	6.64	7.25	up	1.53
ENSG00000167202	35	49	71.4286	5.69	6.3	up	1.53
ENSG00000171988	113	127	88.9764	6.1	6.71	up	1.53
ENSG00000174669	41	50	82	6.72	7.34	up	1.53
ENSG00000177606	20	27	74.0741	6.12	6.73	up	1.53
ENSG00000178537	31	40	77.5	6.29	6.91	up	1.53
ENSG00000179988	18	34	52.9412	5.23	5.84	up	1.53
ENSG00000180198	42	44	95.4545	7.13	7.74	up	1.53
ENSG00000180776	14	28	50	7.94	8.56	up	1.53
ENSG00000184014	104	110	94.5455	6.75	7.37	up	1.53
ENSG00000186575	77	90	85.5556	6.62	7.24	up	1.53
ENSG00000198301	12	12	100	7.73	8.34	up	1.53
ENSG00000198498	22	24	91.6667	6.74	7.36	up	1.53
ENSG00000064601	63	76	82.8947	7.86	8.46	up	1.52
ENSG00000066739	80	112	71.4286	5.19	5.79	up	1.52
ENSG00000074603	73	81	90.1235	6.03	6.63	up	1.52
ENSG00000079134	62	79	78.481	5.75	6.35	up	1.52
ENSG00000082641	54	58	93.1034	7.72	8.32	up	1.52
ENSG00000089685	34	36	94.4444	7.46	8.07	up	1.52
ENSG00000093217	61	85	71.7647	5.64	6.24	up	1.52
ENSG00000095574	23	25	92	6.61	7.22	up	1.52
ENSG00000101247	28	43	65.1163	6.14	6.75	up	1.52
ENSG00000101363	17	20	85	6.8	7.4	up	1.52
ENSG00000102125	34	56	60.7143	5.39	5.99	up	1.52
ENSG00000103042	43	81	53.0864	5.26	5.87	up	1.52
ENSG00000104093	157	208	75.4808	5.4	6.01	up	1.52
ENSG00000104299	63	69	91.3043	6.53	7.14	up	1.52
ENSG00000104635	43	47	91.4894	6.94	7.55	up	1.52
ENSG00000106089	29	51	56.8627	5.68	6.29	up	1.52
ENSG00000107669	52	56	92.8571	6.5	7.1	up	1.52
ENSG00000108588	73	76	96.0526	7.31	7.91	up	1.52
ENSG00000109320	93	109	85.3211	6.16	6.76	up	1.52
ENSG00000113194	49	50	98	7.29	7.89	up	1.52
ENSG00000114019	39	61	63.9344	5.88	6.48	up	1.52
ENSG00000117155	70	88	79.5455	6.16	6.76	up	1.52
ENSG00000119965	23	34	67.6471	5.81	6.41	up	1.52
ENSG00000121964	65	80	81.25	5.44	6.05	up	1.52
ENSG00000122085	37	64	57.8125	5.38	5.99	up	1.52
ENSG00000125166	18	20	90	8.41	9.01	up	1.52
ENSG00000128563	21	30	70	5.6	6.2	up	1.52
ENSG00000128590	20	28	71.4286	5.69	6.3	up	1.52
ENSG00000134283	46	61	75.4098	7.2	7.8	up	1.52
ENSG00000135108	52	60	86.6667	6.54	7.15	up	1.52
ENSG00000136158	15	20	75	5.59	6.2	up	1.52
ENSG00000137409	49	60	81.6667	6.87	7.47	up	1.52
ENSG00000137502	12	31	38.7097	5.05	5.65	up	1.52
ENSG00000137513	49	59	83.0508	6.68	7.29	up	1.52
ENSG00000137522	30	34	88.2353	6.6	7.2	up	1.52
ENSG00000138592	48	57	84.2105	6.17	6.77	up	1.52
ENSG00000138688	219	279	78.4946	5.25	5.86	up	1.52
ENSG00000138757	57	60	95	7.74	8.34	up	1.52
ENSG00000141034	27	40	67.5	5.67	6.27	up	1.52
ENSG00000142634	26	30	86.6667	7.4	8	up	1.52
ENSG00000142875	56	71	78.8732	7.69	8.29	up	1.52
ENSG00000143952	79	103	76.699	5.68	6.28	up	1.52
ENSG00000144524	37	48	77.0833	6.88	7.48	up	1.52
ENSG00000151553	64	79	81.0127	6.25	6.86	up	1.52
ENSG00000152990	43	47	91.4894	6.8	7.4	up	1.52
ENSG00000161011	61	65	93.8462	8.44	9.05	up	1.52
ENSG00000163389	36	47	76.5957	5.33	5.93	up	1.52
ENSG00000163608	40	48	83.3333	6.05	6.65	up	1.52
ENSG00000166377	73	128	57.0312	5.26	5.86	up	1.52
ENSG00000167508	42	49	85.7143	6.96	7.56	up	1.52
ENSG00000168116	26	32	81.25	6.12	6.72	up	1.52
ENSG00000169814	20	32	62.5	5.32	5.92	up	1.52
ENSG00000172086	13	24	54.1667	4.73	5.33	up	1.52
ENSG00000172888	44	57	77.193	5.42	6.02	up	1.52
ENSG00000173599	44	84	52.381	5.32	5.93	up	1.52
ENSG00000174370	12	50	24	4.93	5.53	up	1.52
ENSG00000198917	43	58	74.1379	6.41	7.01	up	1.52
ENSG00000005483	149	164	90.8537	6.04	6.63	up	1.51
ENSG00000007944	32	57	56.1404	5.44	6.04	up	1.51
ENSG00000010803	59	66	89.3939	6.29	6.89	up	1.51
ENSG00000068885	68	79	86.0759	5.5	6.09	up	1.51
ENSG00000072121	140	210	66.6667	5.46	6.05	up	1.51
ENSG00000090316	53	60	88.3333	7.7	8.29	up	1.51
ENSG00000099622	51	73	69.863	7.31	7.9	up	1.51
ENSG00000099783	58	64	90.625	8.63	9.22	up	1.51
ENSG00000105618	51	58	87.931	7.01	7.6	up	1.51
ENSG00000110871	34	36	94.4444	6.95	7.54	up	1.51
ENSG00000112526	86	99	86.8687	8.1	8.7	up	1.51
ENSG00000113643	63	63	100	8.36	8.96	up	1.51
ENSG00000113851	43	52	82.6923	5.93	6.53	up	1.51
ENSG00000114054	71	94	75.5319	7.31	7.9	up	1.51
ENSG00000119720	47	83	56.6265	5.33	5.93	up	1.51
ENSG00000124508	31	37	83.7838	5.66	6.25	up	1.51
ENSG00000133393	26	28	92.8571	6.99	7.59	up	1.51
ENSG00000133678	23	35	65.7143	5.34	5.94	up	1.51
ENSG00000135926	41	57	71.9298	8.39	8.98	up	1.51
ENSG00000136114	15	36	41.6667	5.11	5.7	up	1.51
ENSG00000136271	58	69	84.058	7.84	8.43	up	1.51
ENSG00000143756	42	44	95.4545	6.97	7.56	up	1.51
ENSG00000144161	16	19	84.2105	6.76	7.36	up	1.51
ENSG00000153201	73	79	92.4051	7.24	7.84	up	1.51
ENSG00000154889	21	40	52.5	5.57	6.17	up	1.51
ENSG00000156313	58	77	75.3247	5.33	5.92	up	1.51
ENSG00000158796	46	60	76.6667	6.74	7.33	up	1.51
ENSG00000162290	43	52	82.6923	6.59	7.18	up	1.51
ENSG00000162302	45	71	63.3803	6.06	6.66	up	1.51
ENSG00000163322	24	33	72.7273	6.19	6.78	up	1.51
ENSG00000163539	131	154	85.0649	6.1	6.7	up	1.51
ENSG00000165280	71	71	100	8.34	8.94	up	1.51
ENSG00000166847	31	31	100	7.8	8.4	up	1.51
ENSG00000171208	34	35	97.1429	6.02	6.62	up	1.51
ENSG00000172869	157	198	79.2929	5.29	5.89	up	1.51
ENSG00000173960	29	33	87.8788	6.02	6.61	up	1.51
ENSG00000174483	83	125	66.4	6.01	6.61	up	1.51
ENSG00000175470	33	44	75	5.99	6.58	up	1.51
ENSG00000183763	43	50	86	5.94	6.53	up	1.51
ENSG00000184743	49	58	84.4828	7.18	7.78	up	1.51
ENSG00000197037	15	31	48.3871	5.45	6.04	up	1.51
ENSG00000198431	76	80	95	8.4	9	up	1.51
ENSG00000198836	125	133	93.985	6.96	7.55	up	1.51
ENSG00000020922	46	68	67.6471	5.24	5.83	up	1.5
ENSG00000058673	18	18	100	6.62	7.21	up	1.5
ENSG00000061676	115	121	95.0413	7.19	7.78	up	1.5
ENSG00000064419	93	99	93.9394	7.19	7.77	up	1.5
ENSG00000095261	33	35	94.2857	7.25	7.84	up	1.5
ENSG00000100124	25	29	86.2069	6.24	6.82	up	1.5
ENSG00000100284	43	70	61.4286	5.69	6.28	up	1.5
ENSG00000100485	81	98	82.6531	5.31	5.9	up	1.5
ENSG00000103061	23	32	71.875	6.18	6.76	up	1.5
ENSG00000105221	60	77	77.9221	6.94	7.53	up	1.5
ENSG00000105974	30	33	90.9091	7.53	8.11	up	1.5
ENSG00000106462	68	73	93.1507	6.6	7.19	up	1.5
ENSG00000106524	47	51	92.1569	5.96	6.54	up	1.5
ENSG00000106638	29	38	76.3158	6.4	6.98	up	1.5
ENSG00000107625	15	25	60	6.58	7.16	up	1.5
ENSG00000109572	72	80	90	6.81	7.4	up	1.5
ENSG00000110274	59	149	39.5973	5.26	5.85	up	1.5
ENSG00000111581	99	105	94.2857	7.12	7.71	up	1.5
ENSG00000112282	118	135	87.4074	5.95	6.54	up	1.5
ENSG00000115524	125	127	98.4252	7.92	8.5	up	1.5
ENSG00000116106	41	66	62.1212	5.09	5.68	up	1.5
ENSG00000116747	51	54	94.4444	6.72	7.3	up	1.5
ENSG00000126216	78	91	85.7143	6.27	6.86	up	1.5
ENSG00000127463	110	114	96.4912	7.44	8.02	up	1.5
ENSG00000130305	14	16	87.5	8.23	8.81	up	1.5
ENSG00000132549	227	264	85.9848	5.56	6.14	up	1.5
ENSG00000133812	155	182	85.1648	5.94	6.52	up	1.5
ENSG00000134744	123	148	83.1081	5.82	6.41	up	1.5
ENSG00000135341	77	78	98.7179	6.9	7.48	up	1.5
ENSG00000136891	70	76	92.1053	7.55	8.14	up	1.5
ENSG00000138029	37	45	82.2222	7.4	7.98	up	1.5
ENSG00000140259	54	58	93.1034	7.18	7.77	up	1.5
ENSG00000140632	58	65	89.2308	6.36	6.95	up	1.5
ENSG00000141458	111	117	94.8718	6.86	7.45	up	1.5
ENSG00000143322	46	60	76.6667	6.07	6.66	up	1.5
ENSG00000144468	49	56	87.5	6.99	7.57	up	1.5
ENSG00000145780	26	34	76.4706	6.75	7.33	up	1.5
ENSG00000153234	38	46	82.6087	6.02	6.61	up	1.5
ENSG00000163545	14	37	37.8378	4.96	5.54	up	1.5
ENSG00000164134	84	93	90.3226	7.14	7.72	up	1.5
ENSG00000168038	26	72	36.1111	4.79	5.38	up	1.5
ENSG00000168216	57	62	91.9355	5.7	6.29	up	1.5
ENSG00000168228	40	46	86.9565	5.74	6.33	up	1.5
ENSG00000168385	49	59	83.0508	8.73	9.31	up	1.5
ENSG00000168438	49	54	90.7407	6.94	7.52	up	1.5
ENSG00000172845	22	27	81.4815	6.6	7.18	up	1.5
ENSG00000173852	12	16	75	7.15	7.74	up	1.5
ENSG00000174444	15	25	60	5.77	6.35	up	1.5
ENSG00000174839	71	79	89.8734	5.97	6.56	up	1.5
ENSG00000174989	47	72	65.2778	5.67	6.25	up	1.5
ENSG00000177697	37	40	92.5	8.15	8.73	up	1.5
ENSG00000178053	37	42	88.0952	6.6	7.19	up	1.5
ENSG00000179562	13	20	65	6.25	6.83	up	1.5
ENSG00000181544	40	60	66.6667	5.05	5.64	up	1.5
ENSG00000182858	43	51	84.3137	6.14	6.72	up	1.5
ENSG00000189148	16	18	88.8889	6.29	6.87	up	1.5
ENSG00000197386	255	337	75.6677	5.65	6.24	up	1.5
ENSG00000198162	74	83	89.1566	6.55	7.14	up	1.5
ENSG00000198551	14	16	87.5	5.6	6.18	up	1.5
ENSG00000198586	48	57	84.2105	6.26	6.84	up	1.5
ENSG00000114115	17	17	100	8.01	6.21	down	3.47
ENSG00000189334	18	18	100	9.02	7.69	down	2.52
ENSG00000143320	21	27	77.7778	8.44	7.19	down	2.38
ENSG00000005007	67	95	70.5263	6.76	5.52	down	2.37
ENSG00000111145	22	24	91.6667	7.45	6.2	down	2.37
ENSG00000153179	16	27	59.2593	6.55	5.33	down	2.34
ENSG00000167552	17	20	85	8.11	7.04	down	2.1
ENSG00000163710	43	56	76.7857	6.88	5.87	down	2.02
ENSG00000167755	27	35	77.1429	7.17	6.16	down	2.01
ENSG00000163032	19	20	95	7.79	6.8	down	1.99
ENSG00000167779	20	22	90.9091	8.4	7.42	down	1.96
ENSG00000167748	12	28	42.8571	5.86	4.89	down	1.95
ENSG00000095739	21	28	75	7.3	6.34	down	1.94
ENSG00000105171	24	47	51.0638	7.01	6.07	down	1.91
ENSG00000099812	30	47	63.8298	6.69	5.76	down	1.9
ENSG00000170396	35	54	64.8148	5.78	4.86	down	1.9
ENSG00000099994	27	78	34.6154	6.08	5.16	down	1.89
ENSG00000108244	40	49	81.6327	6.67	5.75	down	1.89
ENSG00000131746	33	47	70.2128	6.78	5.86	down	1.89
ENSG00000170043	27	27	100	9.04	8.12	down	1.88
ENSG00000198816	16	29	55.1724	6.9	5.99	down	1.88
ENSG00000129250	78	93	83.871	7.37	6.48	down	1.86
ENSG00000170231	17	23	73.913	6.52	5.63	down	1.86
ENSG00000173046	18	19	94.7368	8.25	7.37	down	1.84
ENSG00000010270	33	48	68.75	7.25	6.38	down	1.83
ENSG00000104833	15	19	78.9474	6.93	6.07	down	1.82
ENSG00000137094	14	28	50	6.07	5.21	down	1.82
ENSG00000164967	21	22	95.4545	7.62	6.76	down	1.82
ENSG00000074219	38	49	77.551	6.58	5.72	down	1.81
ENSG00000164758	13	18	72.2222	6.52	5.68	down	1.8
ENSG00000069535	51	54	94.4444	6.66	5.82	down	1.79
ENSG00000148229	22	36	61.1111	7.73	6.89	down	1.79
ENSG00000105329	28	36	77.7778	6.89	6.06	down	1.78
ENSG00000130005	18	22	81.8182	7.42	6.59	down	1.78
ENSG00000152766	14	28	50	5.58	4.74	down	1.78
ENSG00000169750	17	17	100	7.67	6.84	down	1.78
ENSG00000074047	15	77	19.4805	5.86	5.04	down	1.77
ENSG00000129455	27	44	61.3636	6.91	6.09	down	1.77
ENSG00000169169	23	91	25.2747	6.27	5.44	down	1.77
ENSG00000175606	28	38	73.6842	7.5	6.67	down	1.77
ENSG00000161642	25	49	51.0204	7.12	6.31	down	1.75
ENSG00000164898	14	18	77.7778	8.02	7.21	down	1.75
ENSG00000167705	12	24	50	6.65	5.84	down	1.75
ENSG00000143164	67	94	71.2766	7.11	6.31	down	1.74
ENSG00000102241	33	52	63.4615	6.26	5.47	down	1.73
ENSG00000129451	15	26	57.6923	6.22	5.43	down	1.73
ENSG00000101265	34	75	45.3333	5.93	5.15	down	1.72
ENSG00000105379	24	26	92.3077	8.71	7.93	down	1.72
ENSG00000027075	43	64	67.1875	6.37	5.6	down	1.71
ENSG00000137267	13	16	81.25	7.77	7	down	1.71
ENSG00000149932	15	19	78.9474	7.02	6.24	down	1.71
ENSG00000136305	12	34	35.2941	6.29	5.53	down	1.7
ENSG00000149357	22	25	88	7.36	6.59	down	1.7
ENSG00000156453	16	38	42.1053	6.31	5.55	down	1.7
ENSG00000144848	48	49	97.9592	7.8	7.05	down	1.69
ENSG00000092068	30	72	41.6667	5.83	5.08	down	1.68
ENSG00000101439	21	25	84	7.99	7.24	down	1.68
ENSG00000102738	15	20	75	6.78	6.03	down	1.68
ENSG00000137038	12	15	80	7.04	6.29	down	1.68
ENSG00000178057	12	19	63.1579	7.64	6.89	down	1.68
ENSG00000069482	18	18	100	8.78	8.04	down	1.67
ENSG00000154553	18	44	40.9091	6.09	5.36	down	1.67
ENSG00000115129	28	35	80	7.19	6.45	down	1.66
ENSG00000133083	15	89	16.8539	5.41	4.69	down	1.65
ENSG00000151414	36	39	92.3077	6.48	5.77	down	1.64
ENSG00000107672	40	40	100	7.46	6.75	down	1.63
ENSG00000117472	33	40	82.5	6.2	5.49	down	1.63
ENSG00000169035	17	31	54.8387	7.25	6.54	down	1.63
ENSG00000149927	13	43	30.2326	6	5.31	down	1.62
ENSG00000105648	30	30	100	8.67	7.98	down	1.61
ENSG00000181885	26	28	92.8571	8.09	7.4	down	1.61
ENSG00000147526	57	78	73.0769	6.69	6.01	down	1.6
ENSG00000165655	23	41	56.0976	6.65	5.97	down	1.6
ENSG00000165996	21	37	56.7568	6.77	6.1	down	1.6
ENSG00000162666	28	36	77.7778	6.72	6.06	down	1.59
ENSG00000116473	16	23	69.5652	7.07	6.41	down	1.58
ENSG00000170689	36	46	78.2609	6.78	6.12	down	1.58
ENSG00000176623	49	55	89.0909	7.26	6.6	down	1.58
ENSG00000104267	36	39	92.3077	7.4	6.74	down	1.57
ENSG00000104419	62	71	87.3239	8.4	7.76	down	1.57
ENSG00000149418	62	71	87.3239	7.68	7.03	down	1.57
ENSG00000181577	15	26	57.6923	6.2	5.55	down	1.57
ENSG00000085871	26	29	89.6552	7.47	6.84	down	1.56
ENSG00000102854	35	62	56.4516	6.4	5.75	down	1.56
ENSG00000132541	24	26	92.3077	7.82	7.18	down	1.56
ENSG00000158825	16	22	72.7273	7.1	6.45	down	1.56
ENSG00000166337	15	17	88.2353	8.66	8.02	down	1.56
ENSG00000006016	16	29	55.1724	6.46	5.83	down	1.55
ENSG00000083807	17	51	33.3333	7.46	6.84	down	1.55
ENSG00000090013	23	27	85.1852	7.91	7.28	down	1.55
ENSG00000107438	17	23	73.913	7.45	6.83	down	1.55
ENSG00000100106	45	89	50.5618	7.06	6.44	down	1.54
ENSG00000102359	29	48	60.4167	5.49	4.87	down	1.54
ENSG00000115616	24	56	42.8571	5.29	4.66	down	1.54
ENSG00000137720	20	32	62.5	7.16	6.54	down	1.54
ENSG00000127337	25	28	89.2857	7.21	6.6	down	1.53
ENSG00000127824	13	16	81.25	7.99	7.37	down	1.53
ENSG00000100426	41	58	70.6897	6.36	5.75	down	1.52
ENSG00000109255	19	23	82.6087	8.31	7.7	down	1.52
ENSG00000141622	13	50	26	5.64	5.04	down	1.52
ENSG00000167644	17	18	94.4444	7.76	7.15	down	1.52
ENSG00000196954	34	48	70.8333	6.96	6.36	down	1.52
ENSG00000076706	51	82	62.1951	6.61	6.02	down	1.51
ENSG00000106683	45	69	65.2174	6.74	6.14	down	1.51
ENSG00000162444	17	19	89.4737	7.57	6.98	down	1.51
ENSG00000170542	30	35	85.7143	6.99	6.39	down	1.51
ENSG00000008394	16	16	100	8.59	8.01	down	1.5
ENSG00000101384	108	119	90.7563	7.23	6.64	down	1.5
ENSG00000120437	38	46	82.6087	8.02	7.43	down	1.5
ENSG00000160161	15	46	32.6087	6.4	5.82	down	1.5
ENSG00000163508	17	47	36.1702	5.62	5.03	down	1.5
ENSG00000168273	12	20	60	7.38	6.8	down	1.5
