# Supplementary material for: Nonsense-Mediated mRNA Decay Impacts MSI-Driven Carcinogenesis and Anti-Tumor Immunity in Colorectal Cancers
Source: PLoS One. 2008 Jul 9;3(7):e2583. doi: 10.1371/journal.pone.0002583 (PMC2440797; doi:10.1371/journal.pone.0002583)
Supplement: Table S3 — Frameshift mutations in 18 target genes whose mRNAs were quantified in 44 MSI primary CRCs. WT: Wild Type; M: Mutated. (0.04 MB XLS) [file pone.0002583.s003.xls]

## Sheet: Sup Table 3
Frameshift mutations in 18 target genes whose mRNAs were quantified in 44 MSI primary CRCs
MSI CRCs	ATR	BAX	BLM	CBF2	CDX2	GRB14	GRK4	IGF2R	MBD4	MSH3	MSH6	RAD50	RBBP8	RECQL	RIZ	TCF4	TFDP2	TGFBRII
T1	WT	WT	M	WT	WT	WT	WT	WT	WT	M	WT	M	M	WT	WT	M	WT	M
T2	WT	M	M	WT	WT	WT	M	M	WT	M	WT	WT	WT	WT	WT	WT	WT	M
T3	WT	WT	WT	WT	WT	WT	M	WT	WT	WT	WT	M	WT	WT	WT	WT	WT	M
T4	WT	M	M	WT	WT	WT	M	nd	M	M	M	M	WT	WT	WT	M	WT	M
T5	M	WT	WT	M	WT	WT	WT	WT	WT	WT	WT	WT	WT	M	WT	M	WT	M
T6	WT	WT	WT	WT	WT	M	WT	M	WT	M	WT	WT	WT	WT	WT	WT	WT	M
T7	M	M	WT	WT	WT	M	WT	WT	WT	M	WT	WT	WT	WT	WT	WT	WT	M
T8	M	WT	WT	WT	WT	WT	WT	WT	M	M	WT	M	WT	WT	WT	M	WT	M
T9	WT	WT	WT	M	WT	WT	WT	WT	M	WT	WT	WT	WT	WT	WT	M	WT	M
T10	WT	M	WT	WT	WT	M	WT	WT	WT	WT	WT	M	WT	M	WT	M	WT	M
T11	WT	M	M	WT	WT	M	WT	WT	WT	WT	WT	M	WT	WT	WT	WT	WT	M
T12	M	M	M	M	WT	WT	WT	WT	M	M	WT	WT	WT	WT	WT	M	WT	M
T13	M	WT	WT	M	WT	WT	WT	M	WT	M	WT	WT	WT	WT	WT	M	WT	M
T14	M	WT	WT	M	WT	M	M	WT	M	WT	WT	WT	WT	WT	WT	WT	WT	M
T15	WT	M	WT	WT	WT	WT	M	WT	WT	WT	M	M	WT	M	WT	M	WT	M
T16	M	M	WT	WT	WT	WT	WT	M	M	WT	WT	WT	WT	WT	WT	WT	WT	M
T17	WT	M	M	WT	WT	WT	M	M	M	WT	M	M	M	WT	WT	M	M	M
T18	M	M	WT	WT	WT	WT	M	WT	M	WT	WT	WT	WT	WT	WT	M	WT	M
T19	M	M	WT	M	WT	WT	WT	WT	M	M	M	M	WT	WT	WT	WT	WT	M
T20	M	M	WT	WT	WT	WT	WT	WT	WT	M	M	WT	WT	M	WT	WT	WT	M
T21	WT	M	WT	WT	WT	WT	WT	WT	M	WT	WT	WT	WT	WT	WT	WT	WT	M
T22	WT	M	WT	M	WT	WT	M	M	WT	WT	WT	WT	WT	WT	WT	WT	WT	M
T23	M	WT	WT	WT	WT	WT	WT	nd	WT	WT	WT	WT	WT	WT	WT	WT	WT	M
T24	WT	WT	WT	WT	WT	WT	WT	WT	M	WT	WT	WT	WT	WT	WT	WT	WT	M
T25	M	WT	WT	WT	WT	WT	WT	WT	M	M	WT	M	WT	WT	WT	WT	WT	M
T26	M	WT	WT	WT	WT	M	WT	M	WT	WT	WT	WT	WT	WT	WT	WT	WT	M
T27	M	WT	WT	WT	WT	WT	WT	nd	WT	M	M	M	WT	WT	M	WT	WT	M
T28	M	M	M	M	WT	M	WT	WT	M	M	M	M	M	WT	WT	WT	WT	M
T29	WT	M	WT	WT	WT	M	WT	M	WT	M	WT	WT	M	WT	WT	WT	WT	M
T30	M	WT	WT	WT	WT	M	WT	nd	M	WT	WT	M	WT	WT	WT	M	WT	M
T31	M	WT	WT	WT	WT	M	WT	nd	M	WT	WT	M	WT	WT	WT	WT	WT	M
T32	M	WT	WT	M	WT	M	WT	nd	M	M	WT	WT	WT	WT	WT	WT	WT	M
T33	M	WT	WT	WT	WT	WT	M	WT	WT	WT	M	WT	WT	WT	WT	WT	WT	M
T34	WT	M	WT	WT	WT	M	M	WT	M	M	WT	WT	M	WT	WT	M	WT	M
T35	M	WT	WT	M	WT	WT	WT	WT	WT	WT	WT	M	WT	WT	WT	WT	WT	M
T36	WT	M	M	WT	WT	M	WT	nd	WT	M	WT	WT	WT	WT	WT	WT	WT	M
T37	M	M	WT	WT	WT	WT	WT	WT	WT	M	WT	M	WT	WT	WT	M	WT	M
T38	M	M	WT	M	WT	WT	WT	nd	WT	M	WT	M	WT	WT	WT	M	WT	M
T39	WT	M	M	WT	WT	WT	WT	nd	WT	WT	M	WT	M	WT	WT	WT	WT	M
T40	M	WT	M	M	WT	M	M	WT	WT	M	M	M	WT	WT	WT	M	WT	M
T41	M	M	M	WT	WT	M	WT	WT	WT	M	M	M	WT	WT	WT	M	WT	M
T42	WT	WT	WT	WT	WT	M	WT	M	WT	WT	WT	M	WT	M	WT	WT	WT	M
T43	WT	WT	nd	WT	WT	WT	M	WT	WT	WT	WT	M	WT	WT	WT	M	WT	WT
T44	M	M	nd	M	M	WT	M	WT	WT	WT	WT	M	M	WT	WT	M	WT	M
Mutation Frequency	25/44	23/44	11/42	13/44	1/44	16/44	13/44	9/35	17/44	21/44	11/44	22/44	7/44	5/44	1/44	19/44	1/44	43/44
F (%)	56.8	52.3	26.2	29.5	2.3	36.4	29.5	25.7	38.6	47.7	25.0	50.0	15.9	11.4	2.3	43.2	2.3	97.7
